# Supplementary material for: Adamantyl derivatives and rearranged benzophenones from Garcinia xanthochymus fruits
Source: Royal Society of Chemistry journal article supplement (doi:10.1039/c7ra01543g), 2017-01-01
Supplement: c7ra01543g1.pdf [file c7ra01543g1.pdf]

# **Adamantyl derivatives and rearranged benzophenones from *Garcinia xanthochymus* fruits**

Yu Chen<sup>‡ a</sup>, Fei Gan<sup>‡ a</sup>, Shan Jin<sup>b</sup>, Hui Liu<sup>a</sup>, Shijun Wu<sup>c</sup>, Wenting Yang<sup>c</sup>, Guangzhong Yang<sup>b\*</sup>

<sup>a</sup> College of Chemistry and Material Sciences, South-Central University for

Nationalities, Wuhan 430074, P. R. China

<sup>b</sup> School of Pharmaceutical Sciences, South-Central University for Nationalities,

Wuhan 430074, P. R. China

<sup>c</sup> College of Environmental and Biological Engineering, Wuhan Technology and

Business University, Wuhan 430065, P. R. China

---

<sup>‡</sup> These authors contributed equally to this work.

\*Corresponding author: Professor, Guangzhong Yang Ph. D., Tel/fax: +86-27-67841196; E-mail: yanggz888@126.com

### **Electronic Supplementary Information**

- 1.** Spectra of compound **1** p3-8
- 2.** Spectra of compound **2** p 8-13
- 3.** Spectra of compound **3** p13-18
- 4.** Spectra of compound **4** in CD<sub>5</sub>N<sub>5</sub> p19-23
- 5.** Spectra of compound **4** in CDCl<sub>3</sub> p14-25
- 6.** Spectra of compound **5** in CD<sub>5</sub>N<sub>5</sub> p26-30
- 7.** Spectra of compound **5** in CDCl<sub>3</sub> p31-32
- 8.** <sup>1</sup>H-NMR of compound 6-14 p33-37
- 9.** Table 1. Full HMBCs of compounds **1-3** p38
- 10.** Table 2. <sup>1</sup>H, <sup>13</sup>C NMR data of compounds **4** and **5** in CDCl<sub>3</sub> p39
- 11.** HPLC Chromatographic profiles of compound 15-17 p40-41

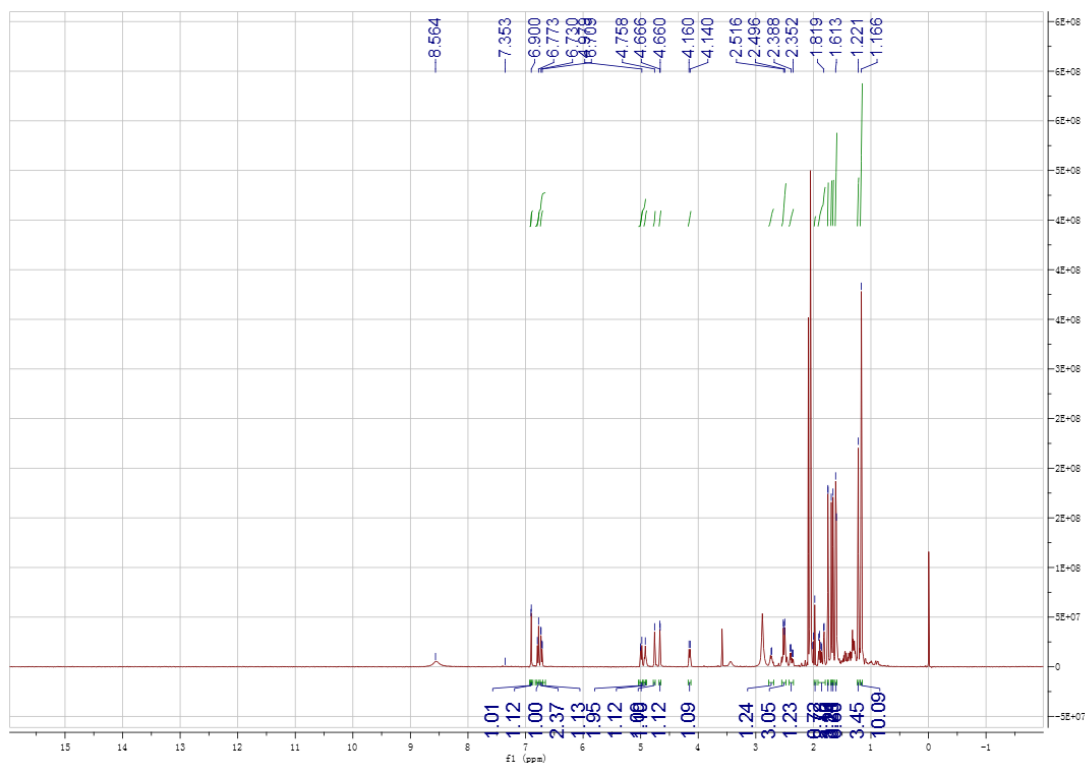

<sup>1</sup>H-NMR spectrum of compound **1**

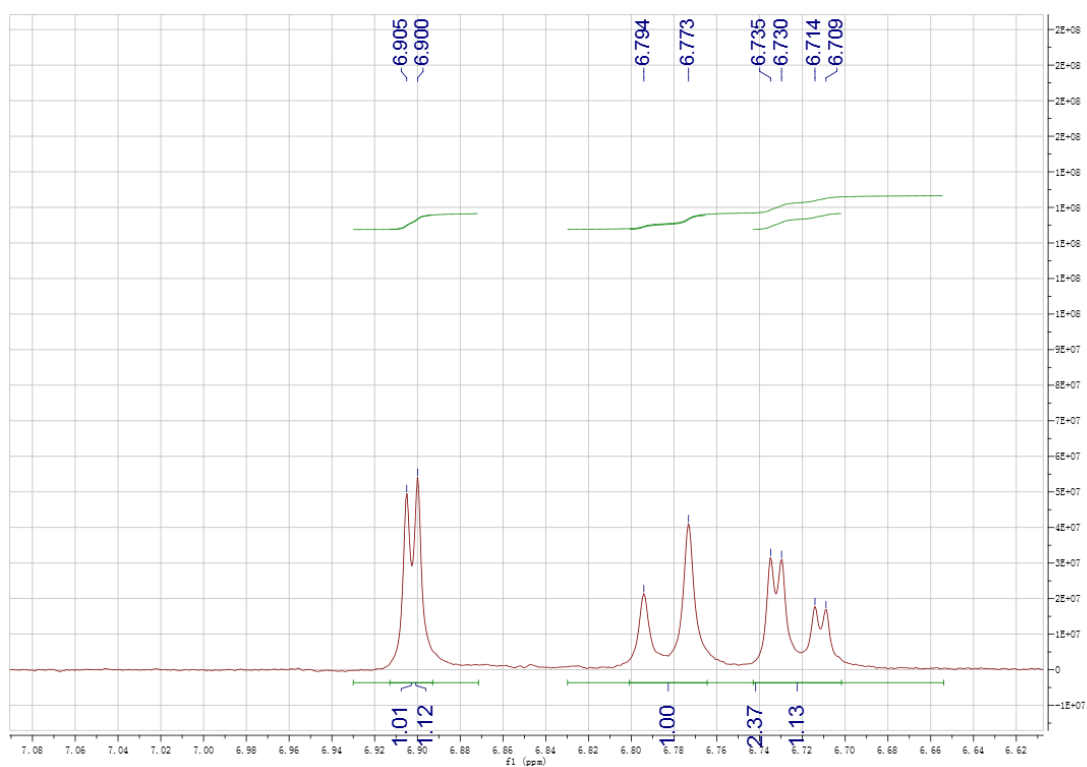

<sup>1</sup>H-NMR spectrum of compound **1**(expanded region to confirm the 1,3,4-trisubstituted benzene system. )

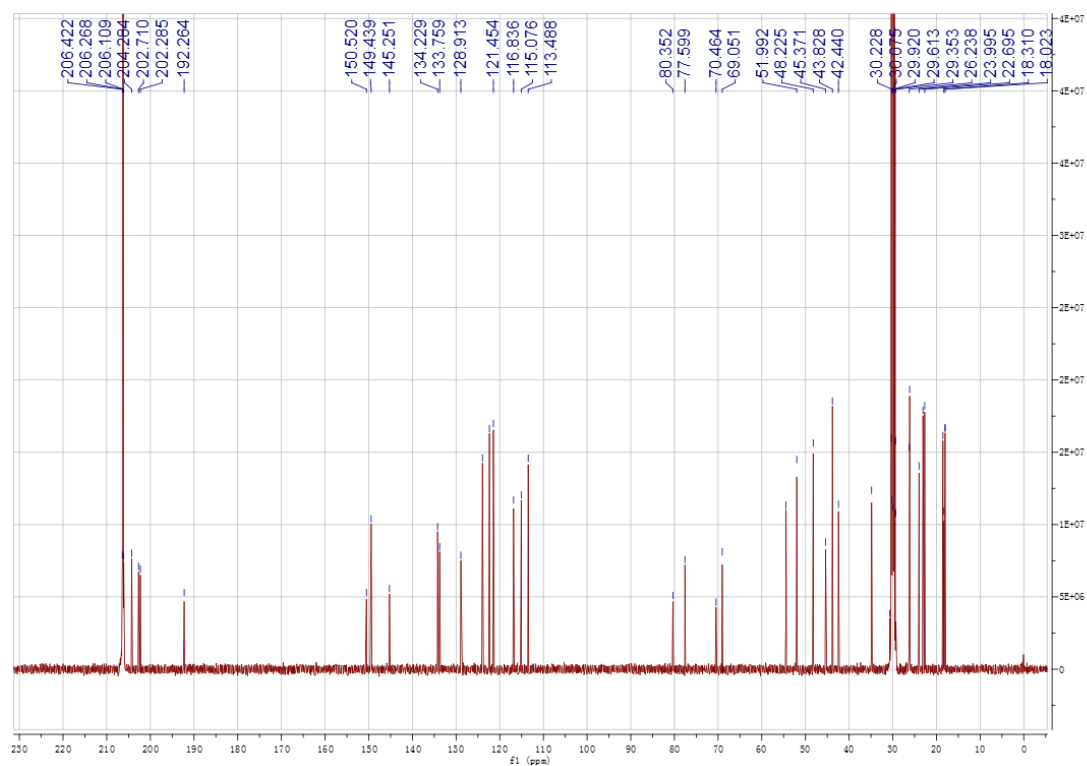

<sup>13</sup>C-NMR spectrum of compound 1

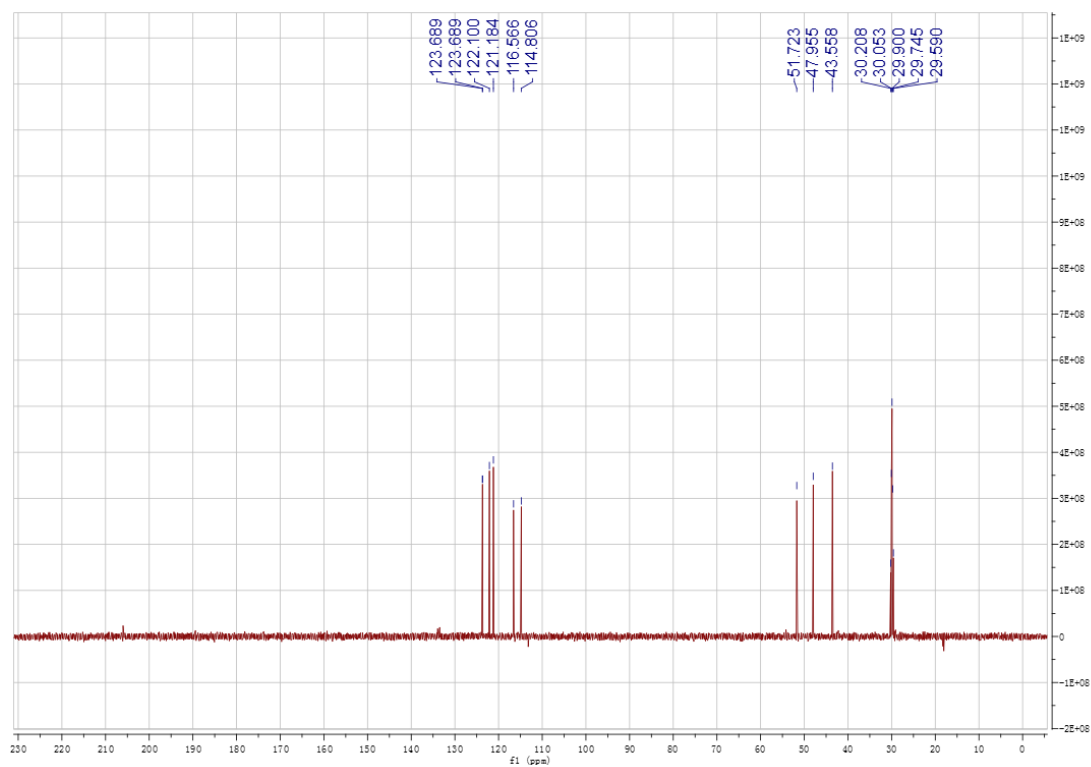

DEPT spectrum of compound 1

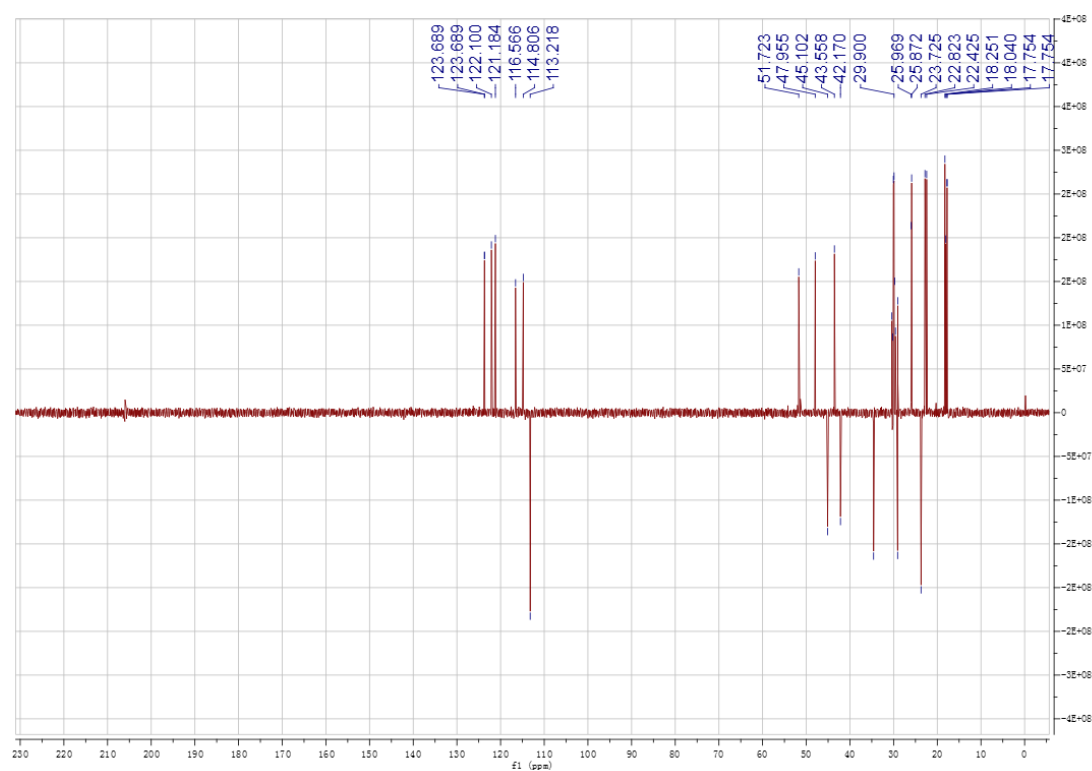

DEPT spectrum of compound 1

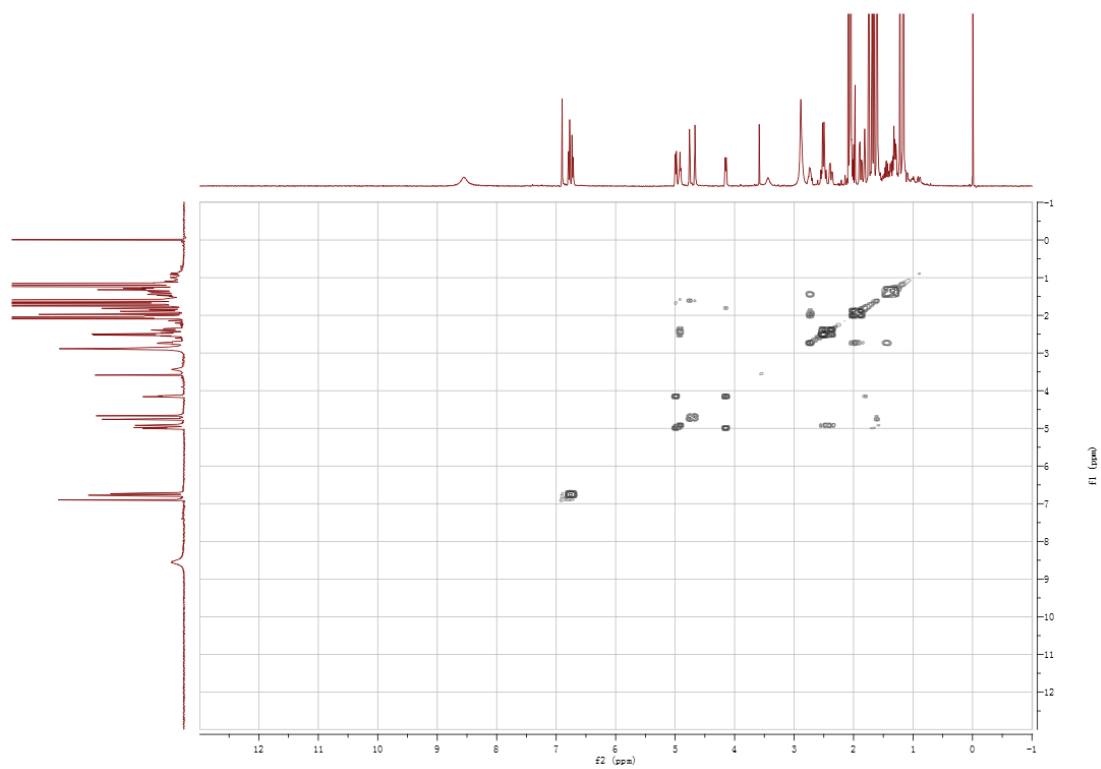

$^1\text{H}$ - $^1\text{H}$  COSY spectrum of compound 1

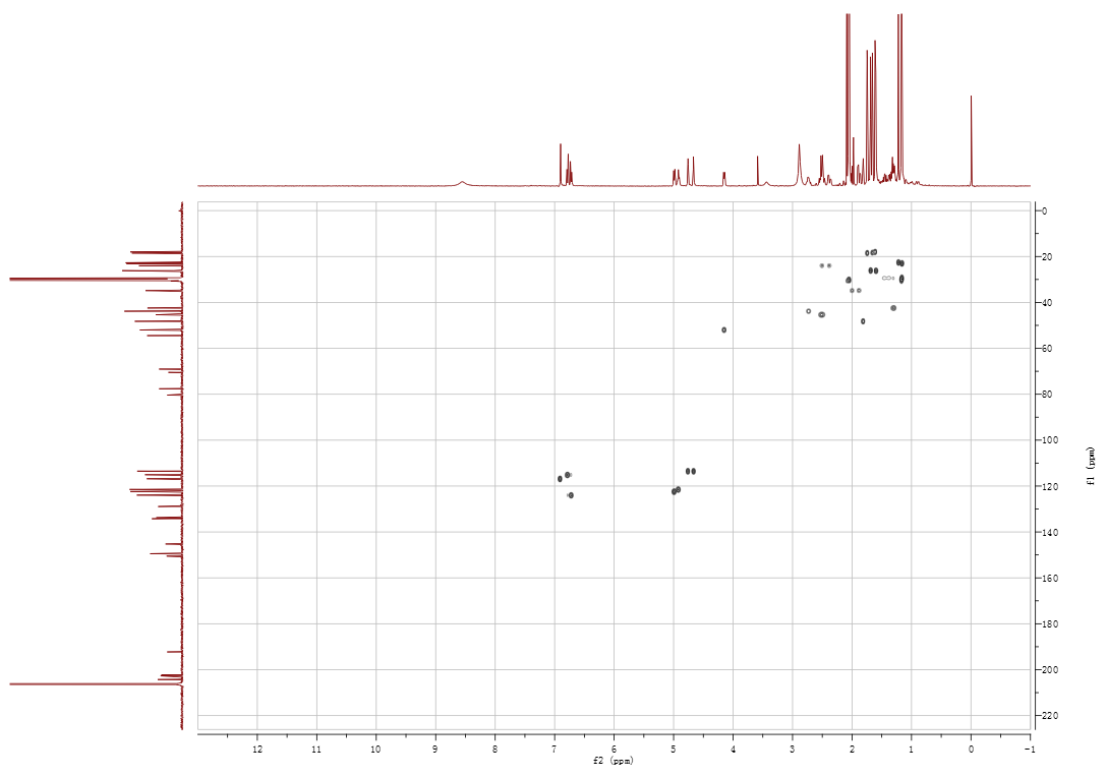

HSQC spectrum of compound **1**

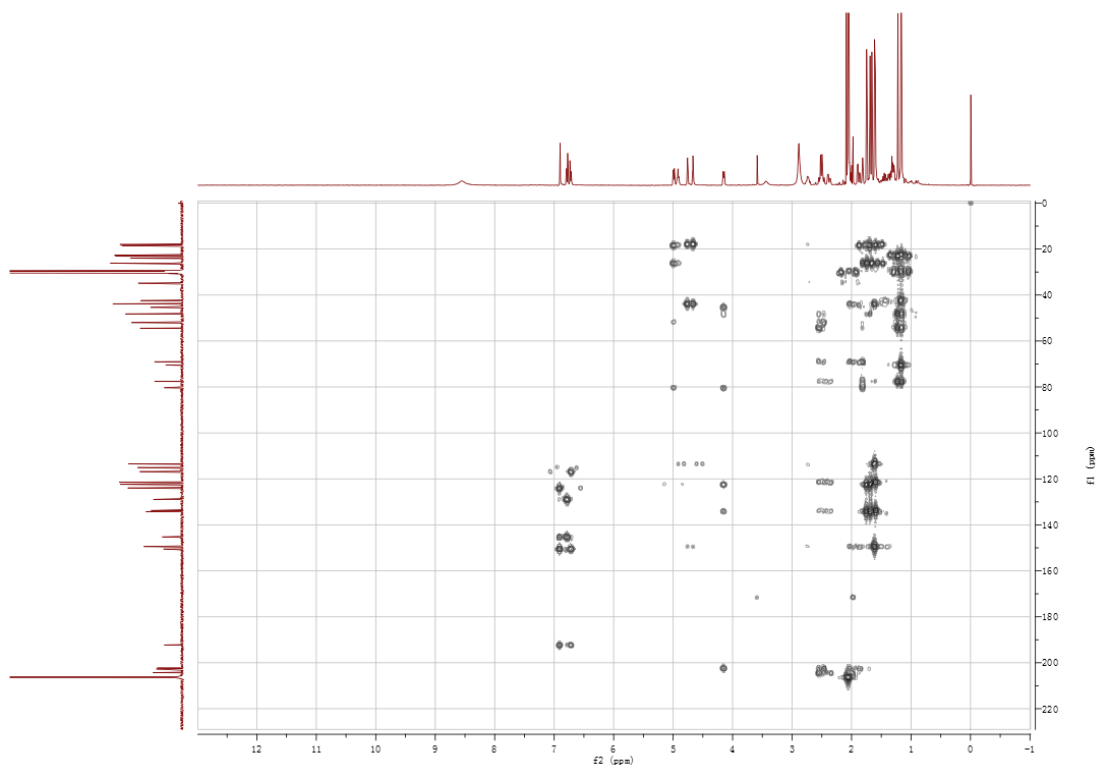

HMBC spectrum of compound **1**

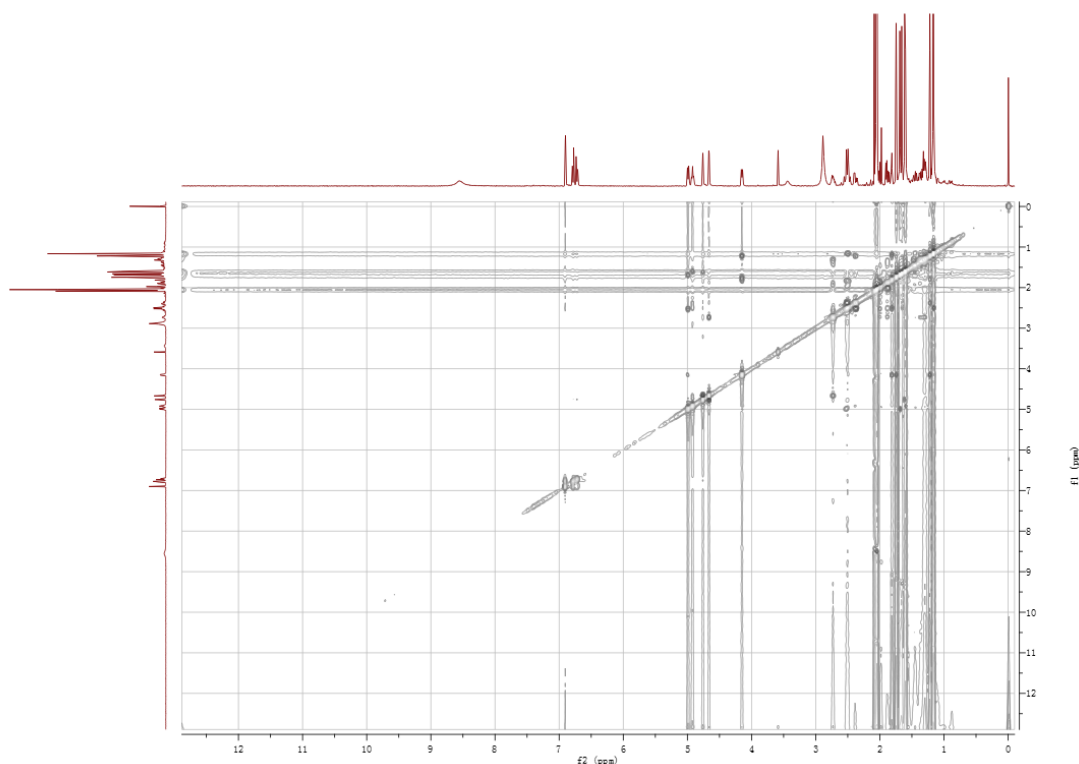

ROESY spectrum of compound **1**

#### Elemental Composition Report

Page 1

##### Single Mass Analysis

Tolerance = 10.0 PPM / DBE: min = -10.0, max = 120.0

Selected filters: None

Monoisotopic Mass, Odd and Even Electron Ions

74 formula(e) evaluated with 1 results within limits (up to 51 closest results for each mass)

Elements Used:

C: 0-200 H: 0-400 O: 6-15

gf-41

12:26:17 02-Dec-2015

Voltage EI+

KIB  
M151202EA-01AFAMM 19 (1.744)  
618.3550

Autospec Premier  
P776  
94.8

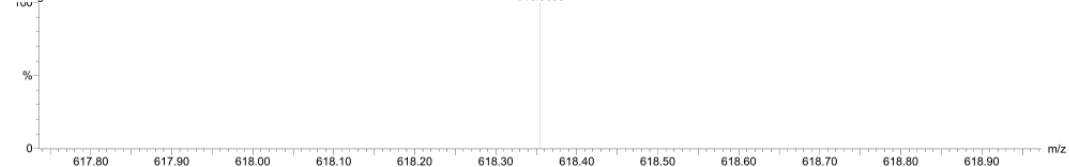

|          |            |      |      |       |           |            |
|----------|------------|------|------|-------|-----------|------------|
| Minimum: |            |      |      | -10.0 |           |            |
| Maximum: | 200.0      | 10.0 |      | 120.0 |           |            |
| Mass     | Calc. Mass | mDa  | PPM  | DBE   | i-FIT     | Formula    |
| 618.3550 | 618.3557   | -0.7 | -1.1 | 14.0  | 5546067.5 | C38 H50 O7 |

HR-EI-MS spectrum of compound **1**

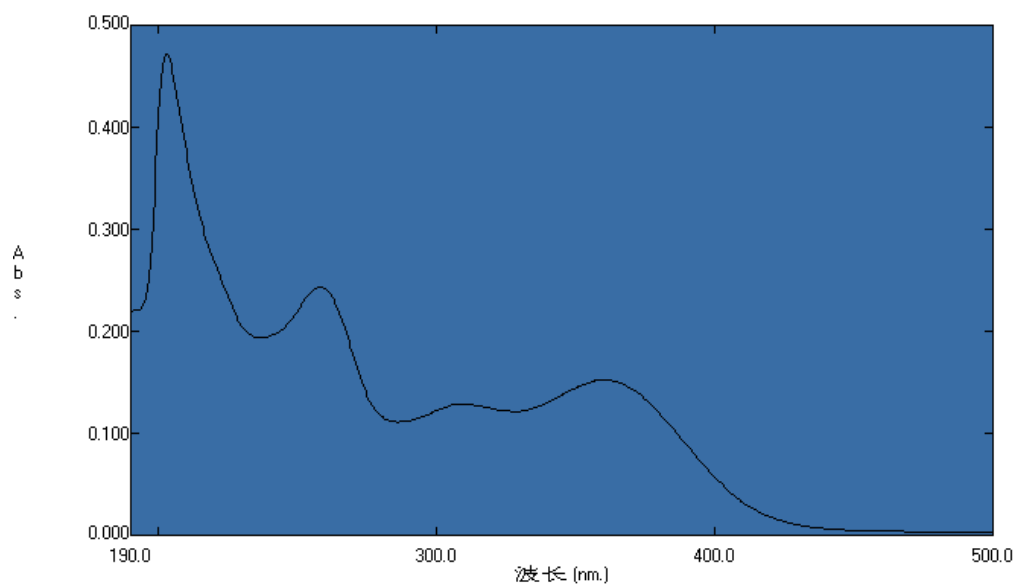

UV spectrum of compound **1**

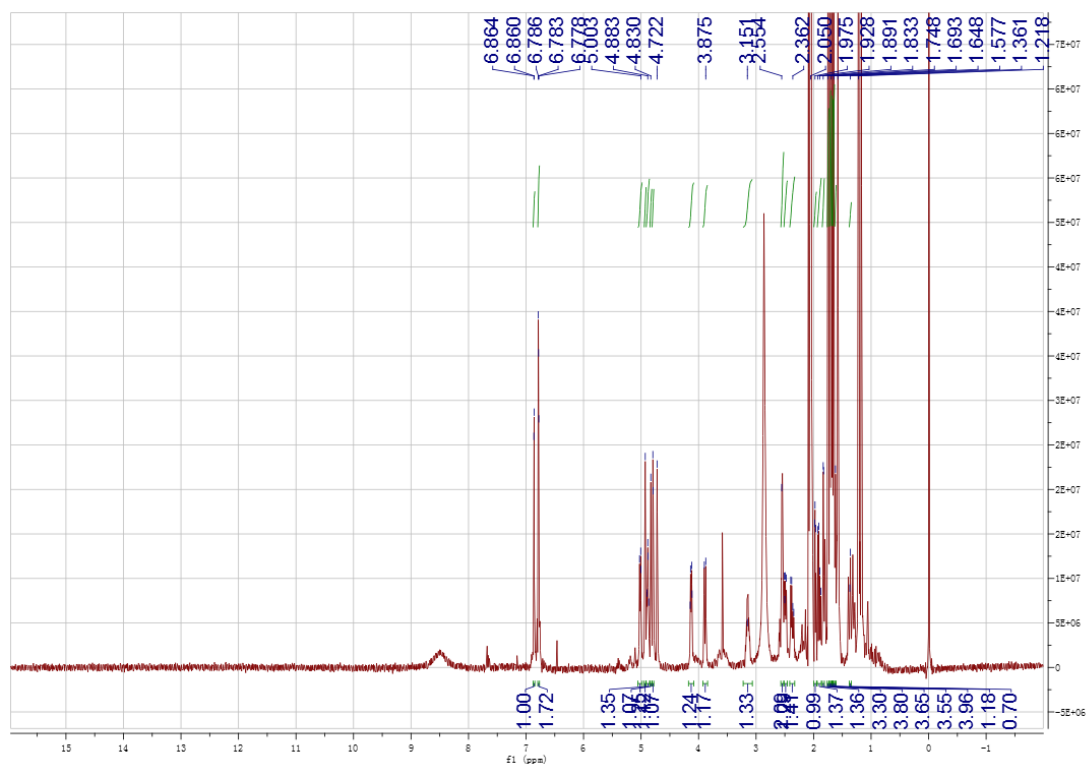

$^1\text{H}$ -NMR spectrum of compound **2**



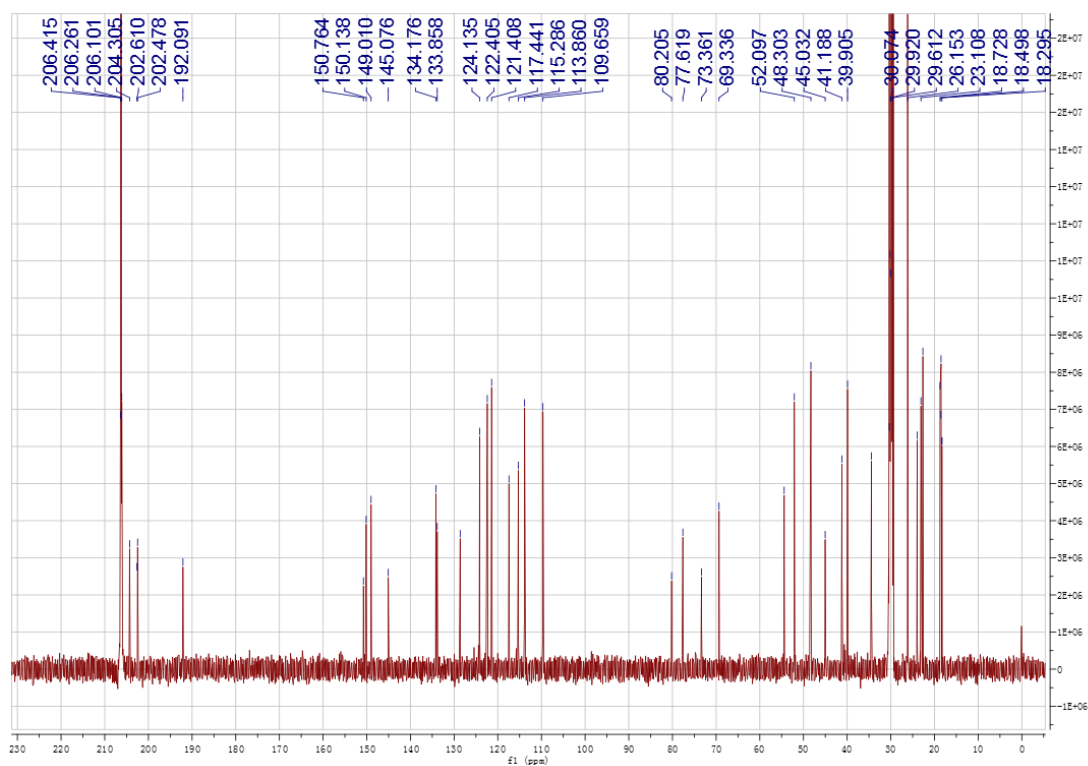

<sup>13</sup>C-NMR spectrum of compound 2

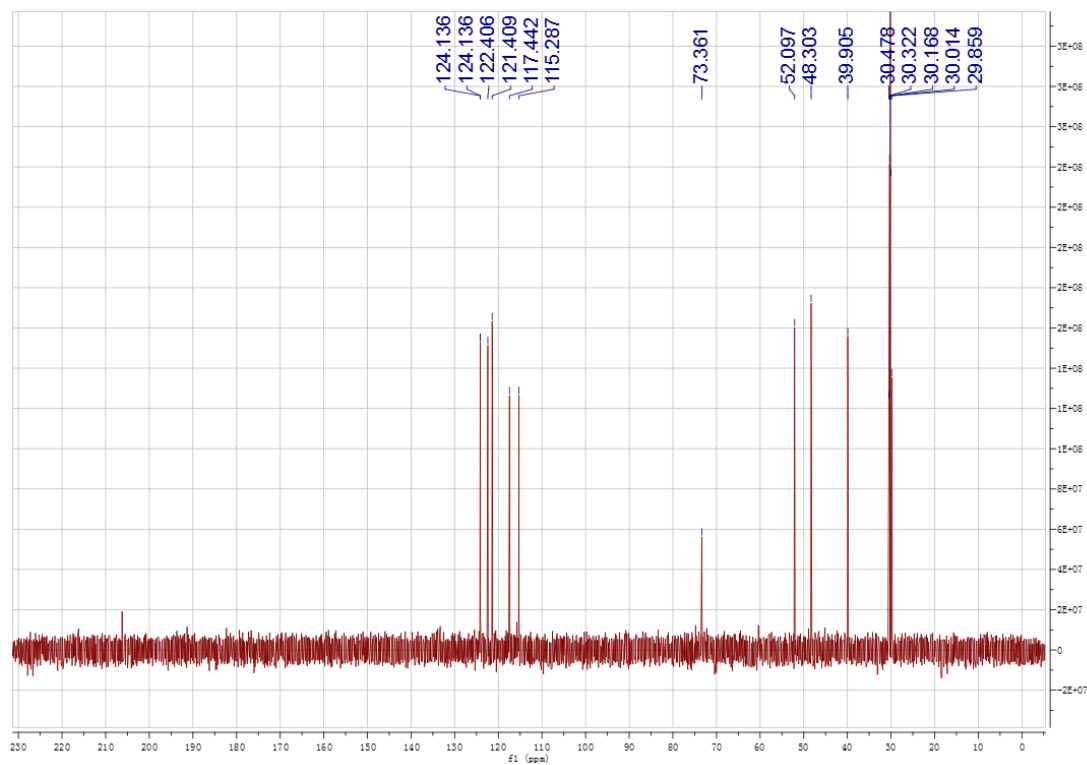

DEPT spectrum of compound 2

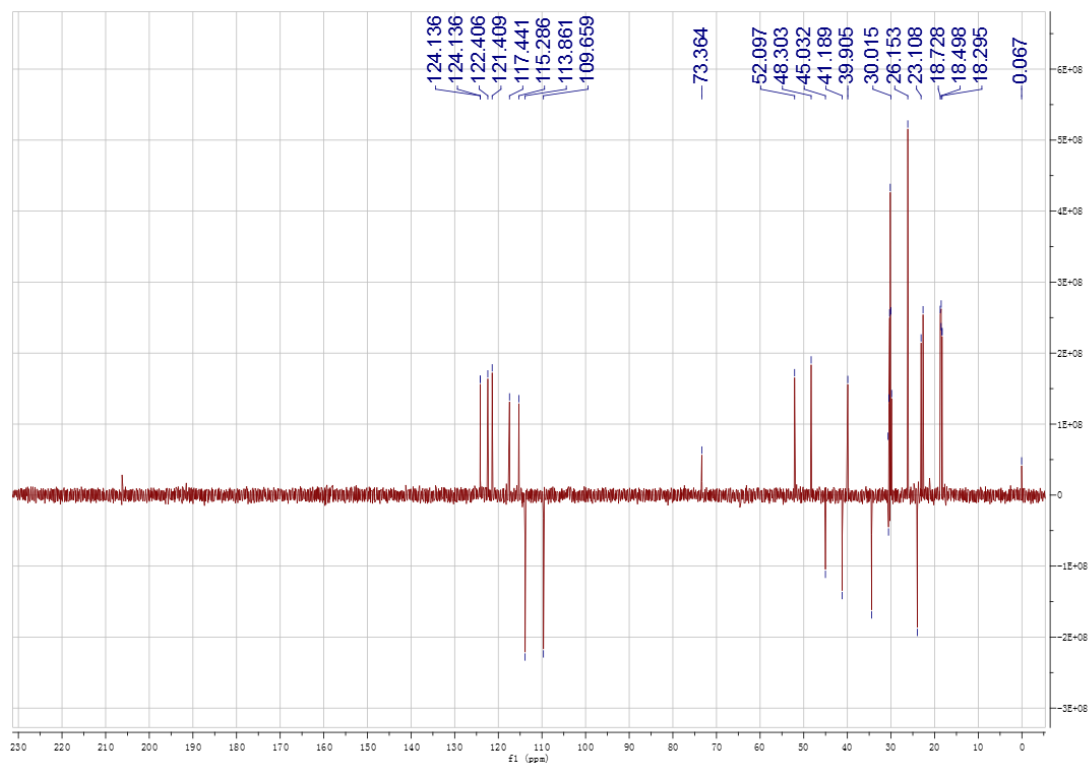

DEPT spectrum of compound 2

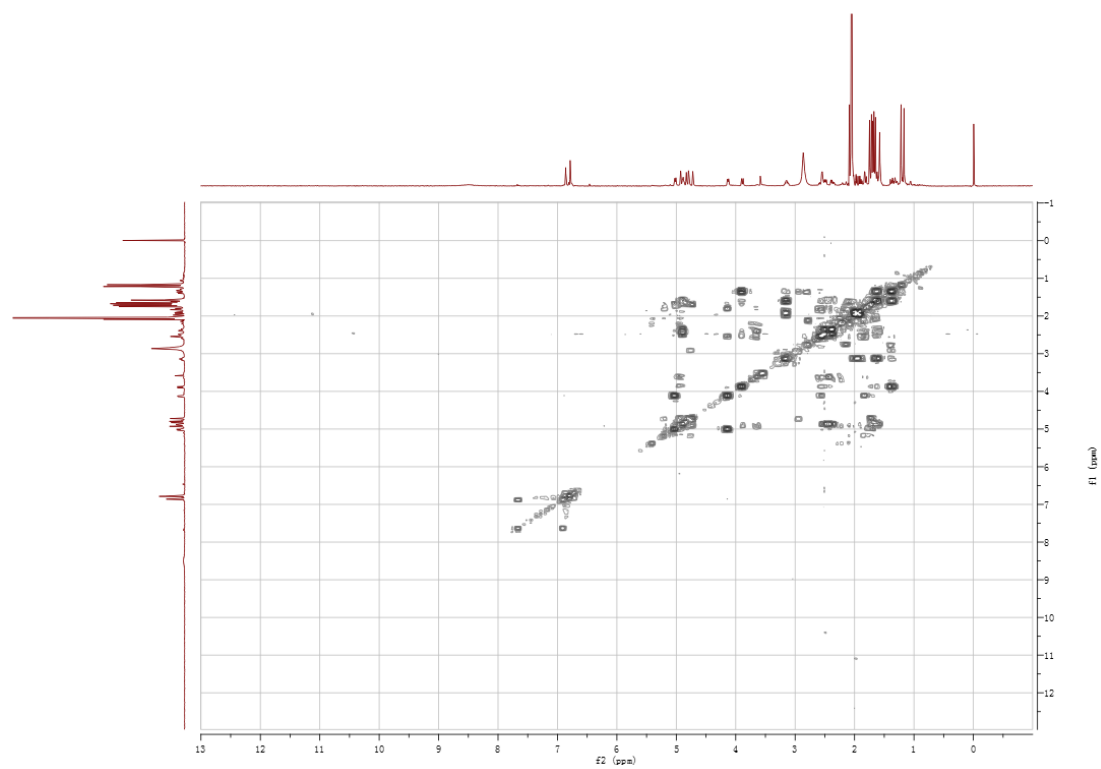

$^1\text{H}$ - $^{13}\text{C}$  HOSY spectrum of compound 2

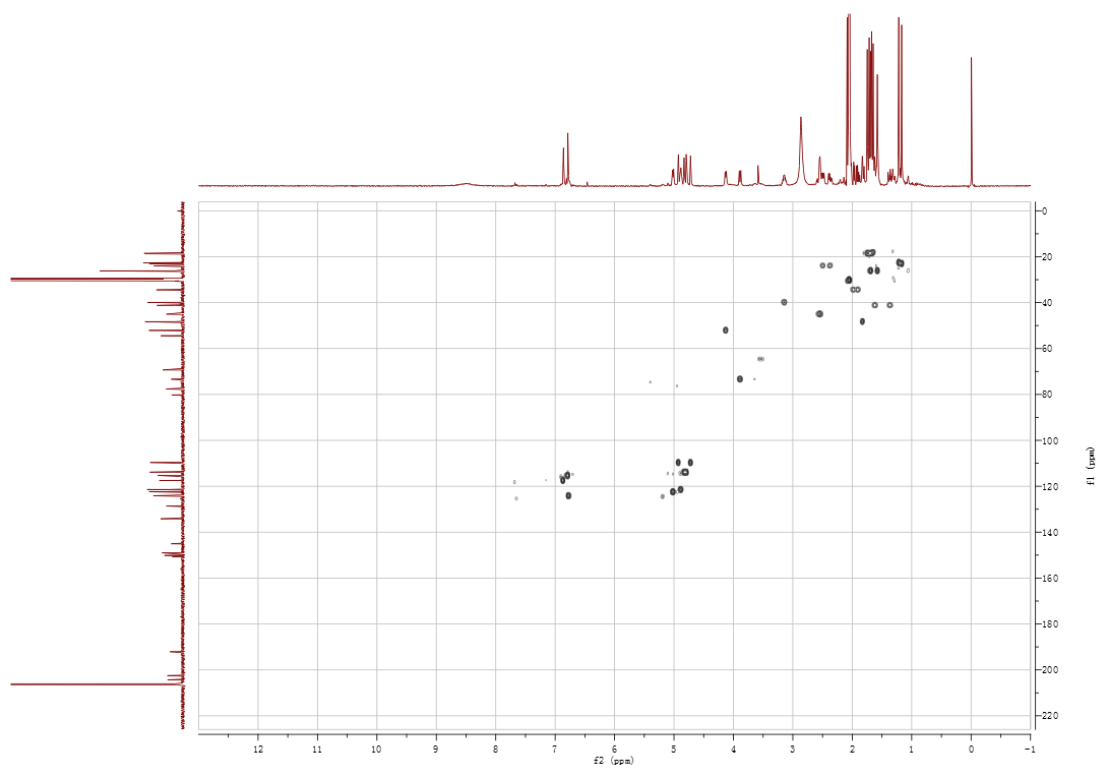

HSQC spectrum of compound 2

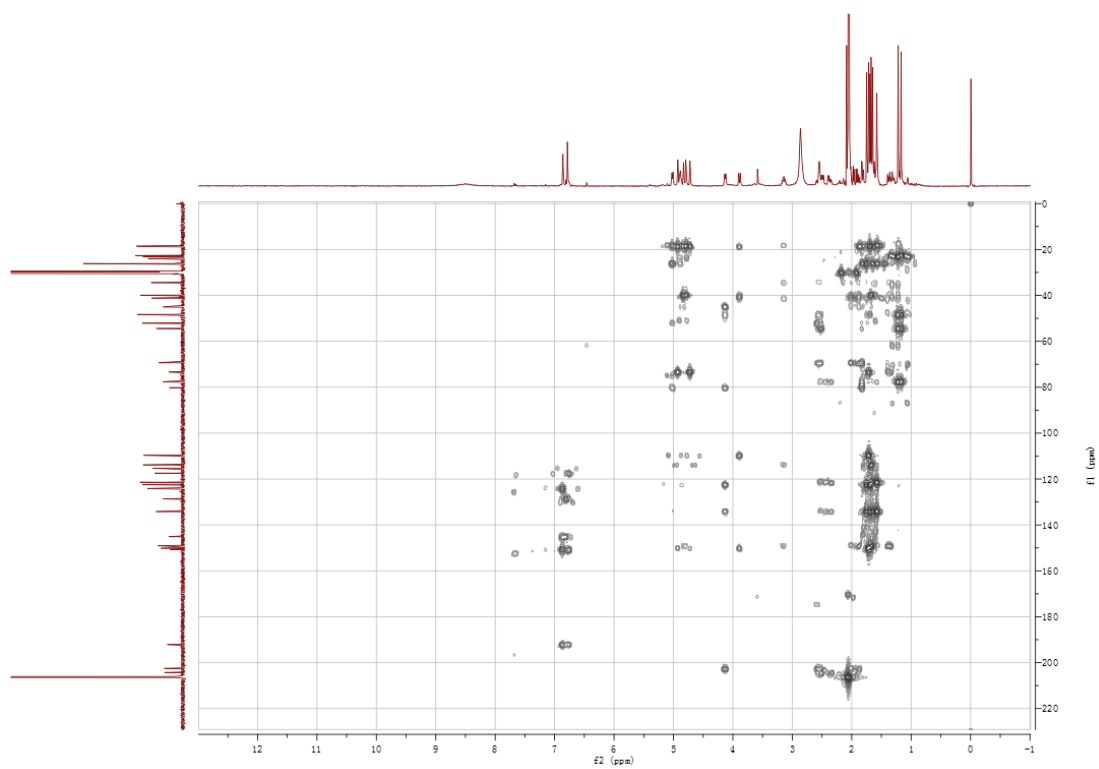

HMBC spectrum of compound 2

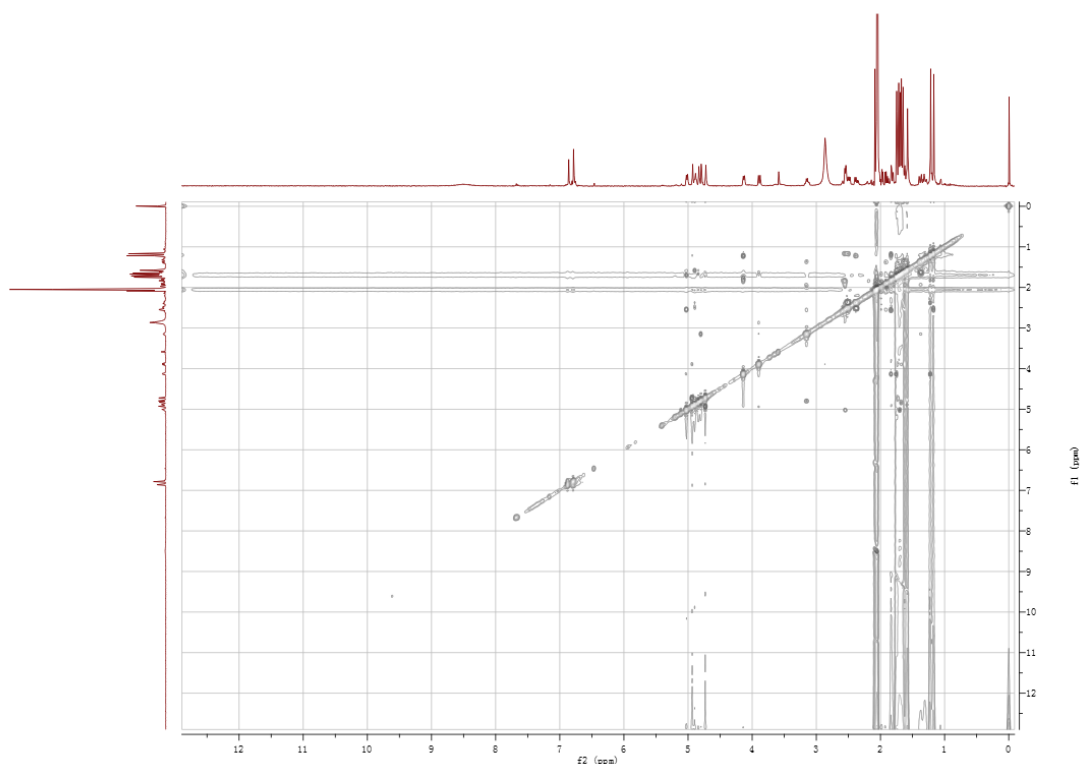

ROESY spectrum of compound **2**

#### User Spectra

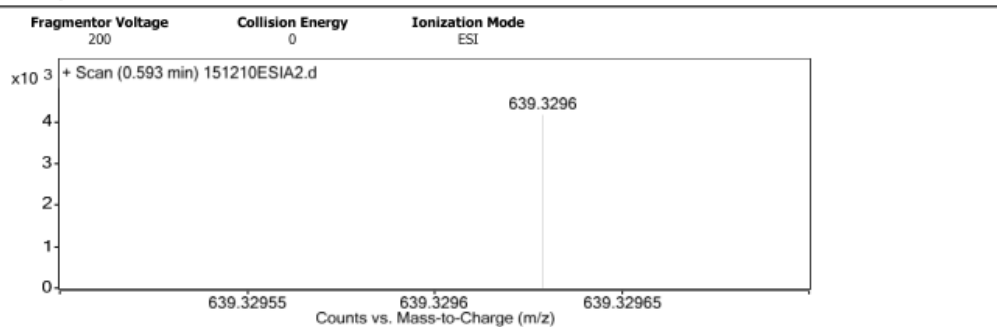

#### Peak List

| <i>m/z</i> | <i>z</i> | Abund   | Formula                                           | Ion |
|------------|----------|---------|---------------------------------------------------|-----|
| 274.274    | 1        | 2135.6  |                                                   |     |
| 639.3296   | 1        | 4180.78 | C <sub>38</sub> H <sub>48</sub> Na O <sub>7</sub> | M+  |
| 640.3328   | 1        | 1630.64 | C <sub>38</sub> H <sub>48</sub> Na O <sub>7</sub> | M+  |
| 655.3097   | 1        | 1284.74 |                                                   |     |
| 922.0098   | 1        | 1322.09 |                                                   |     |
| 1255.6703  |          | 5355.09 |                                                   |     |
| 1256.6753  | 1        | 4333.14 |                                                   |     |
| 1257.6784  | 1        | 2740.9  |                                                   |     |
| 1271.6492  |          | 2339.48 |                                                   |     |
| 1272.6541  | 1        | 1705.43 |                                                   |     |

#### Formula Calculator Element Limits

| Element | Min | Max |
|---------|-----|-----|
| C       | 0   | 200 |
| H       | 0   | 400 |
| O       | 0   | 10  |
| Na      | 1   | 1   |

#### Formula Calculator Results

| Formula                                           | CalculatedMass | CalculatedMz | Mz       | Diff. (mDa) | Diff. (ppm) | DBE     |
|---------------------------------------------------|----------------|--------------|----------|-------------|-------------|---------|
| C <sub>38</sub> H <sub>48</sub> Na O <sub>7</sub> | 639.3298       | 639.3292     | 639.3296 | -0.8        | -1.2        | 14.5000 |

--- End Of Report ---

HR-ESI-MS spectrum of compound **2**

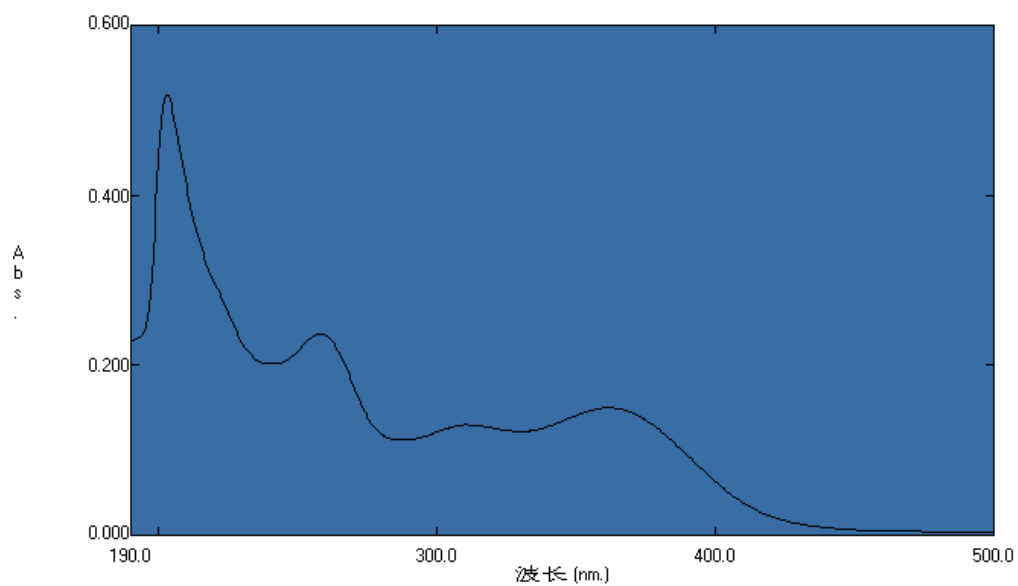

UV spectrum of compound **2**

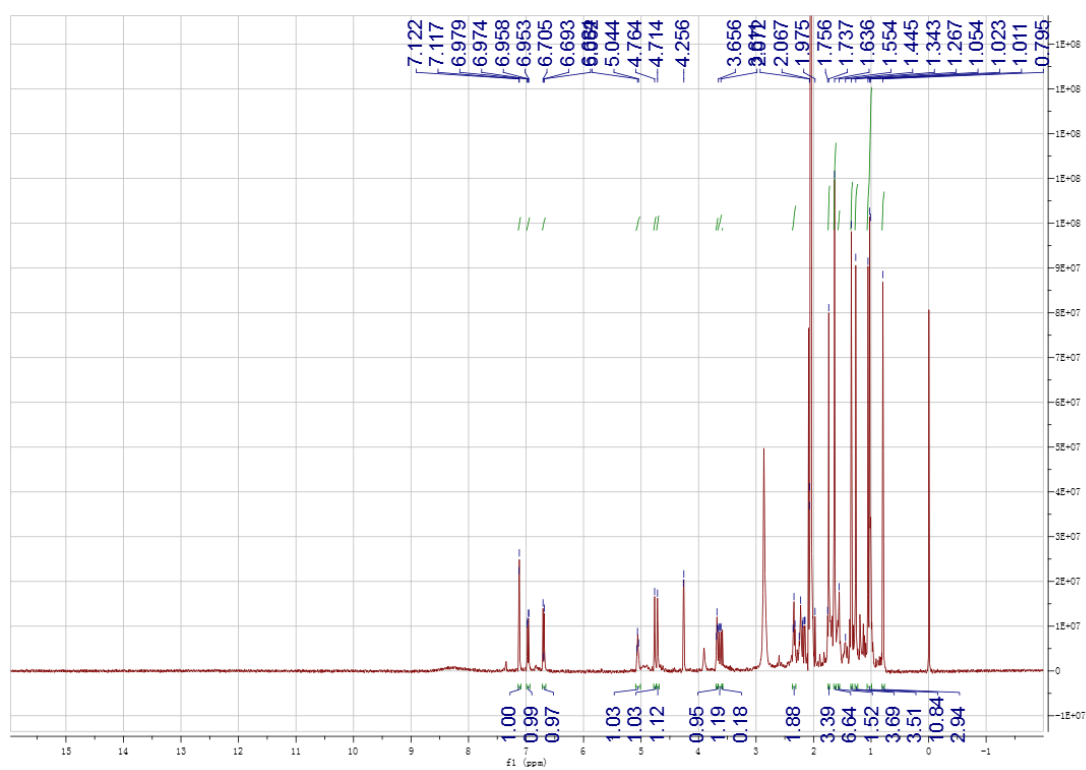

$^1\text{H}$ -NMR spectrum of compound **3**

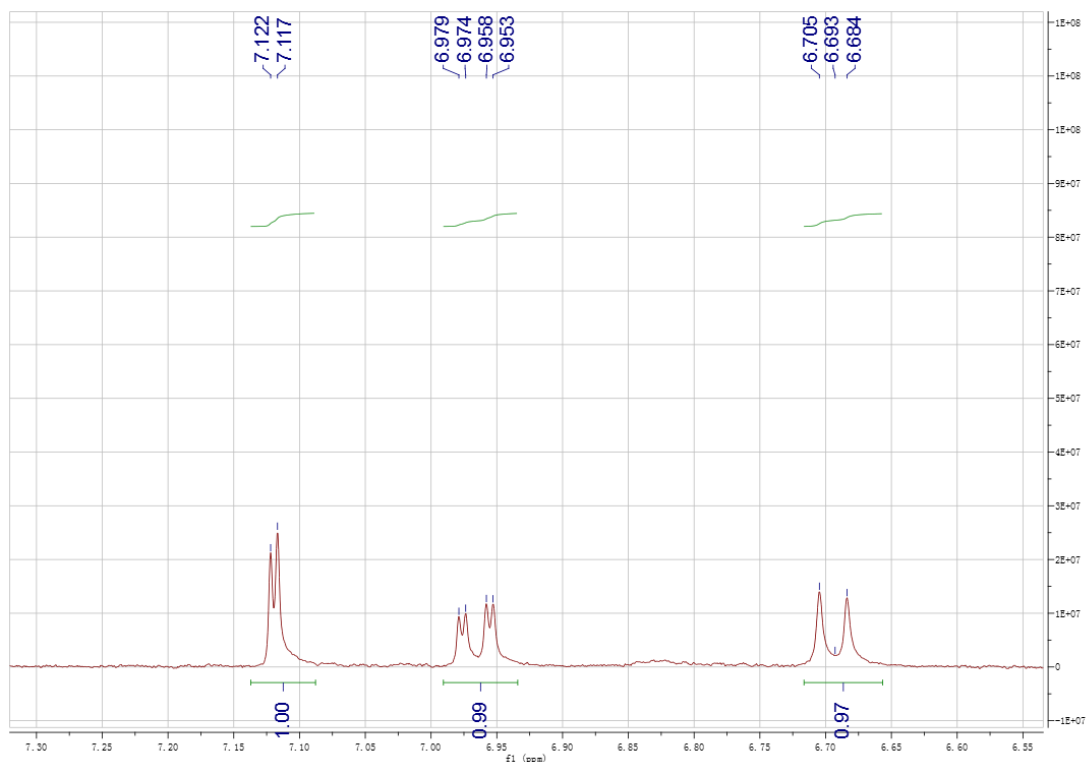

$^1\text{H}$ -NMR spectrum of compound **3**(expanded region to confirm the 1,3,4-trisubstituted benzene system. )

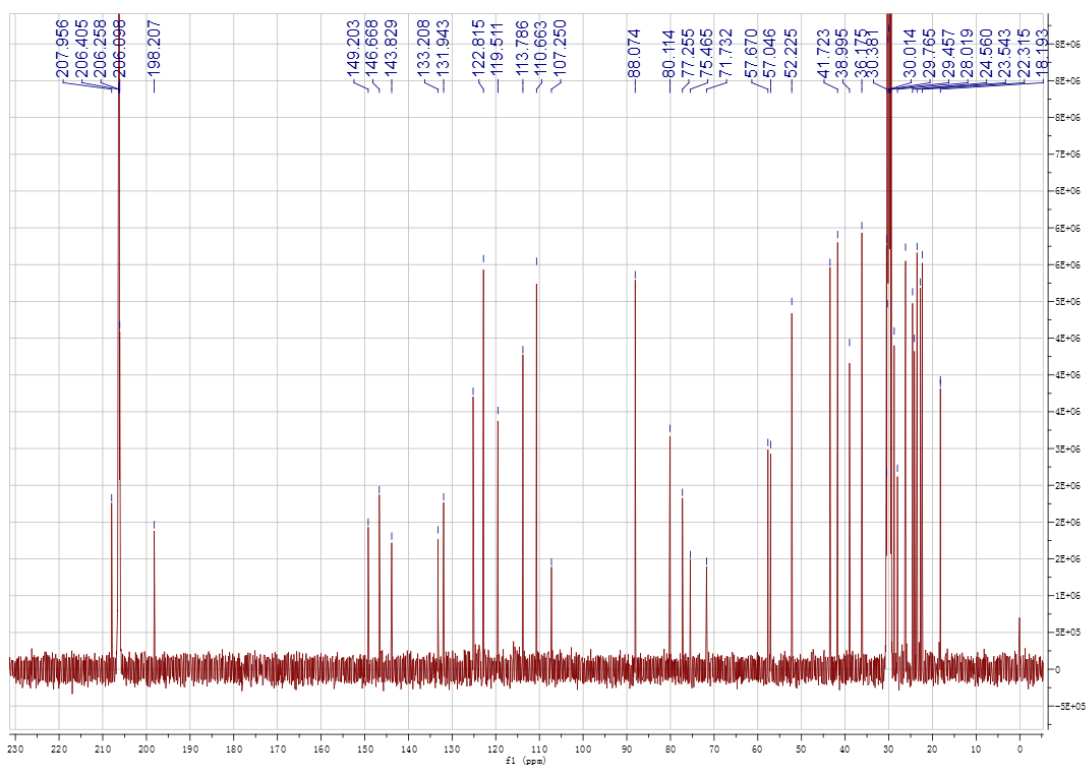

$^{13}\text{C}$ -NMR spectrum of compound **3**

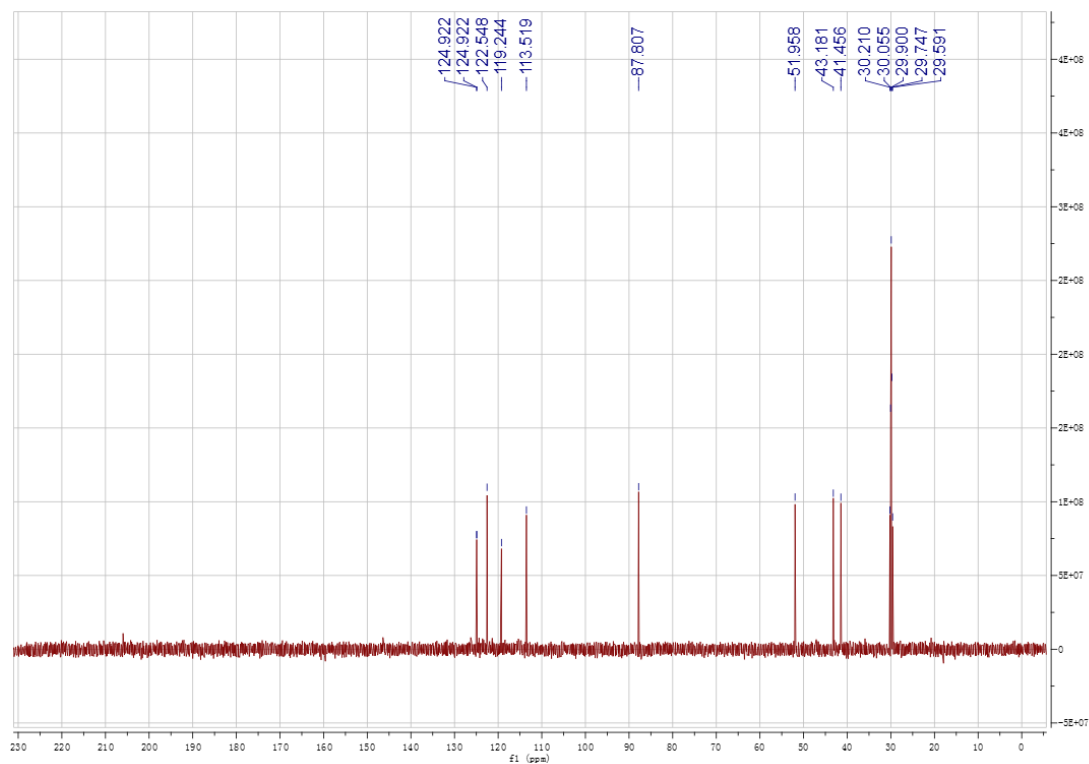

DEPT spectrum of compound 3

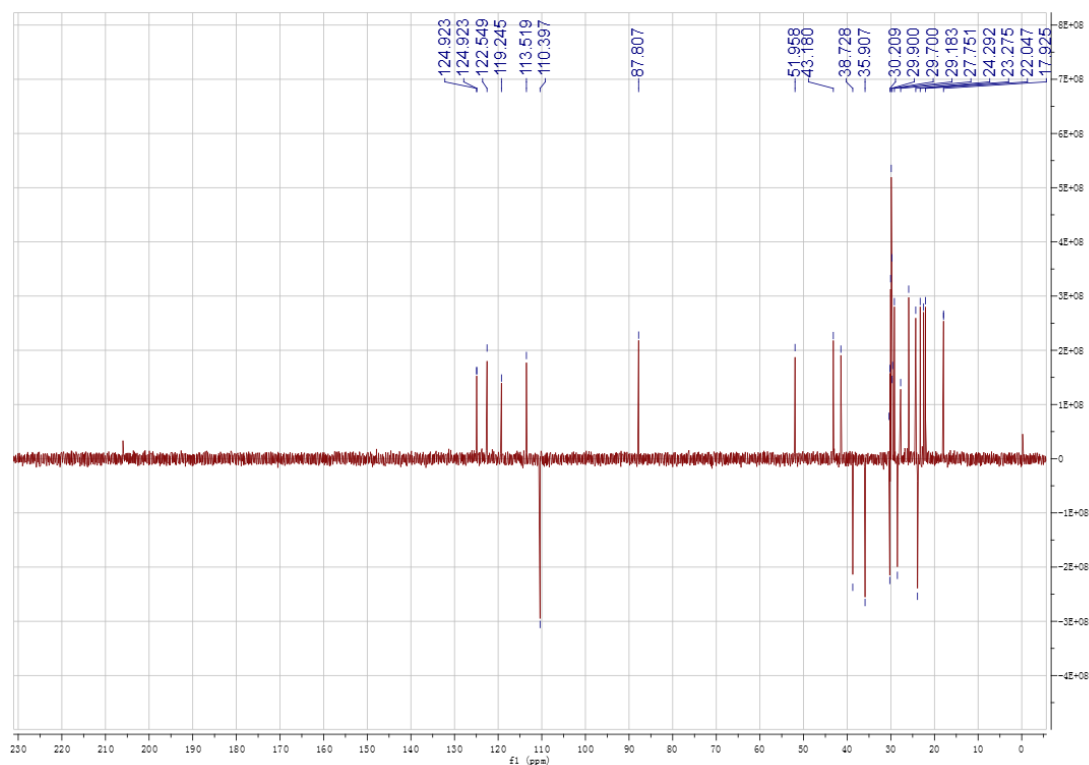

DEPT spectrum of compound 3

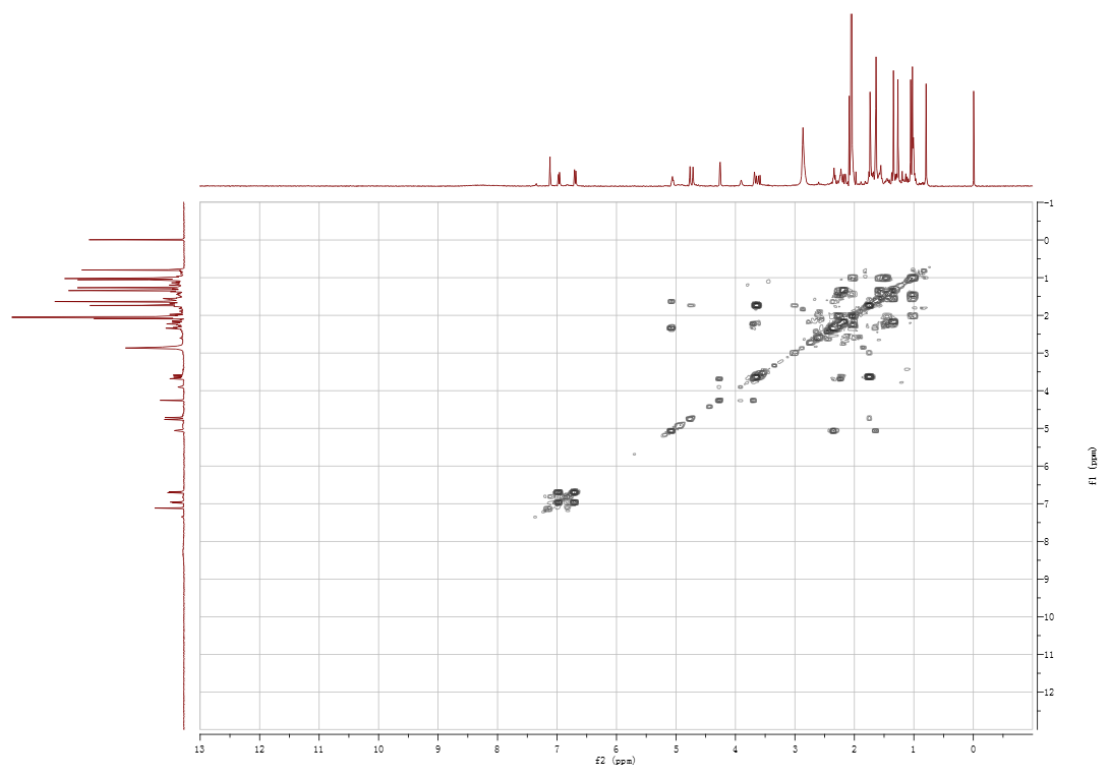

$^1\text{H}$ - $^1\text{H}$  COSY spectrum of compound **3**

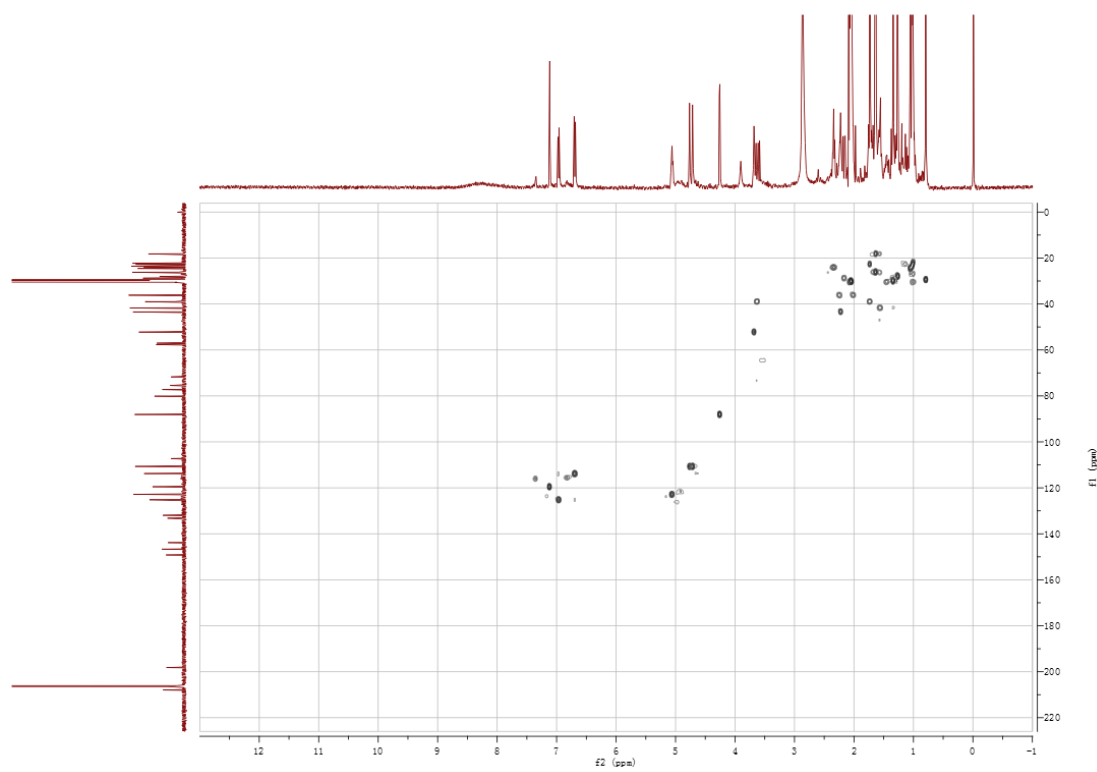

HSQC spectrum of compound **3**



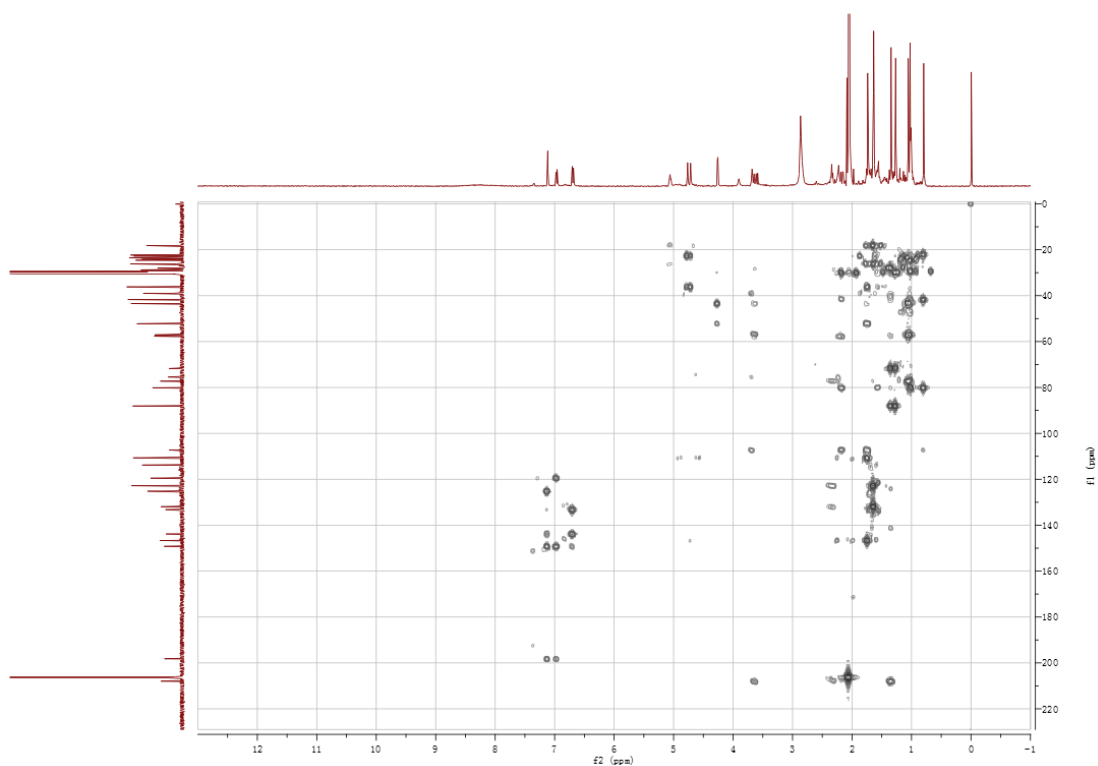

HMBC spectrum of compound **3**

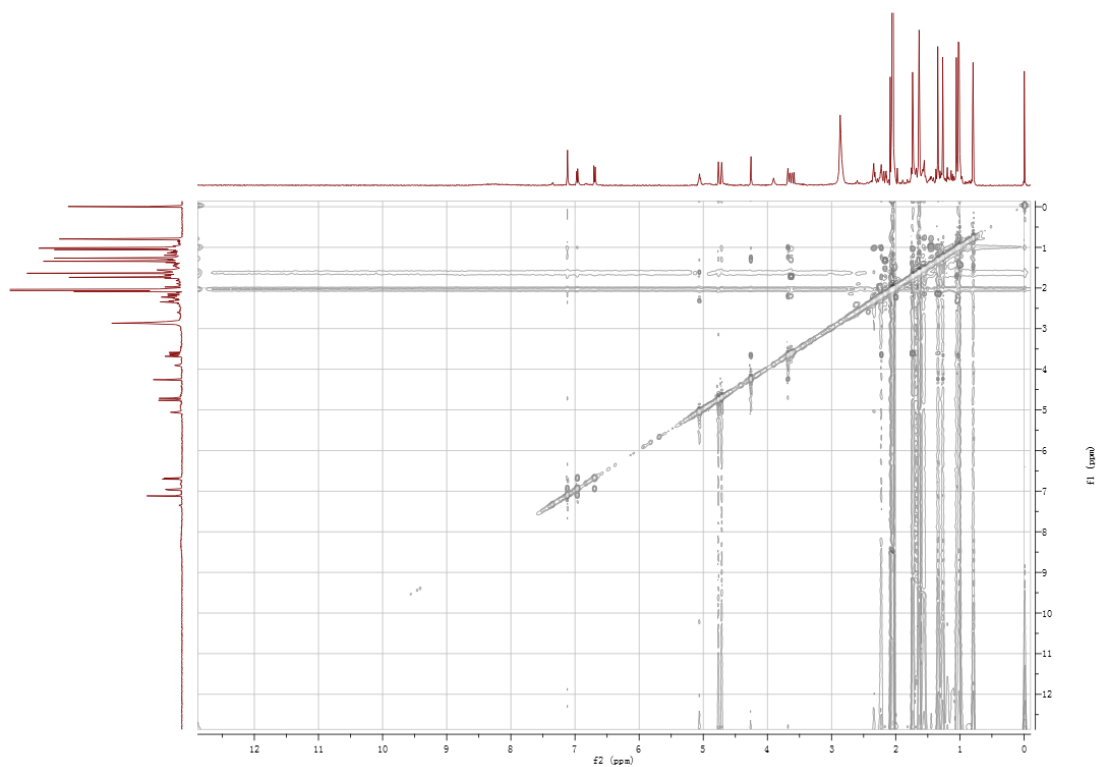

ROESY spectrum of compound **3**

## User Spectra

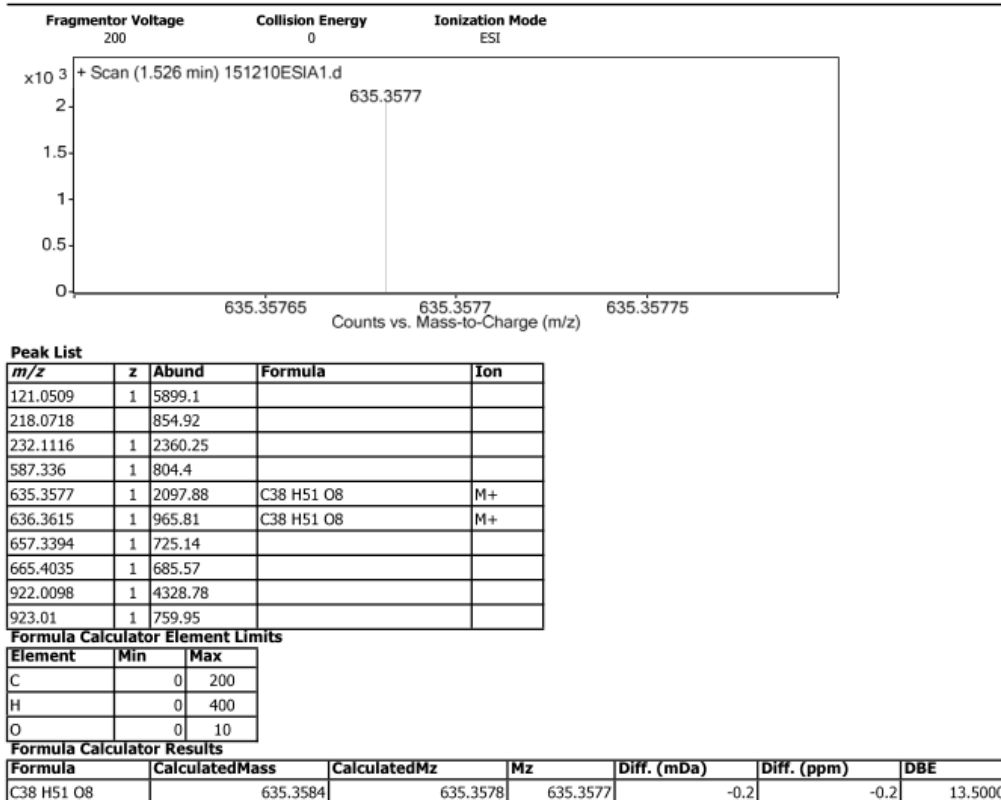

HR-ESI-MS spectrum of compound **3**

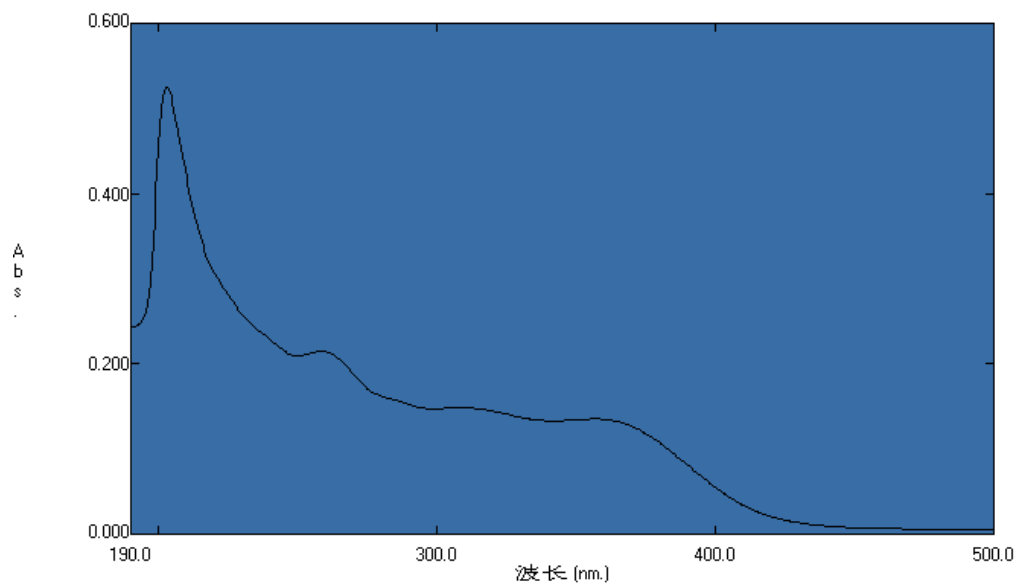

UV spectrum of compound **3**

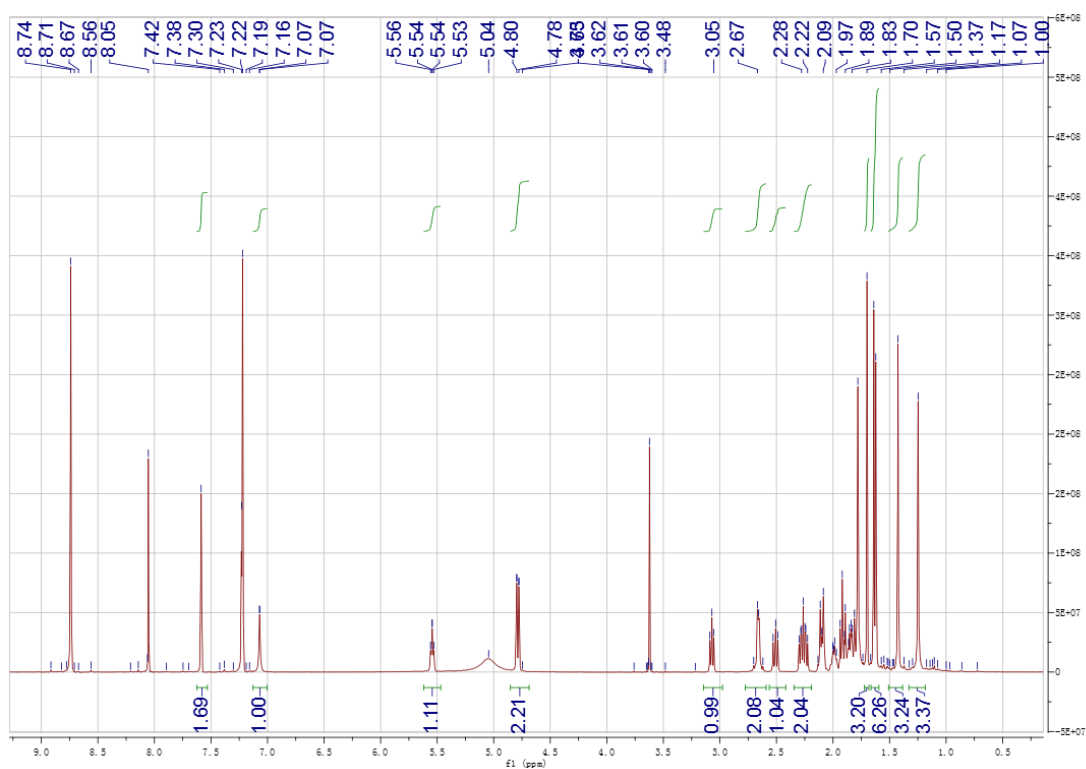

<sup>1</sup>H-NMR spectrum of compound **4** in CD<sub>5</sub>N<sub>5</sub>

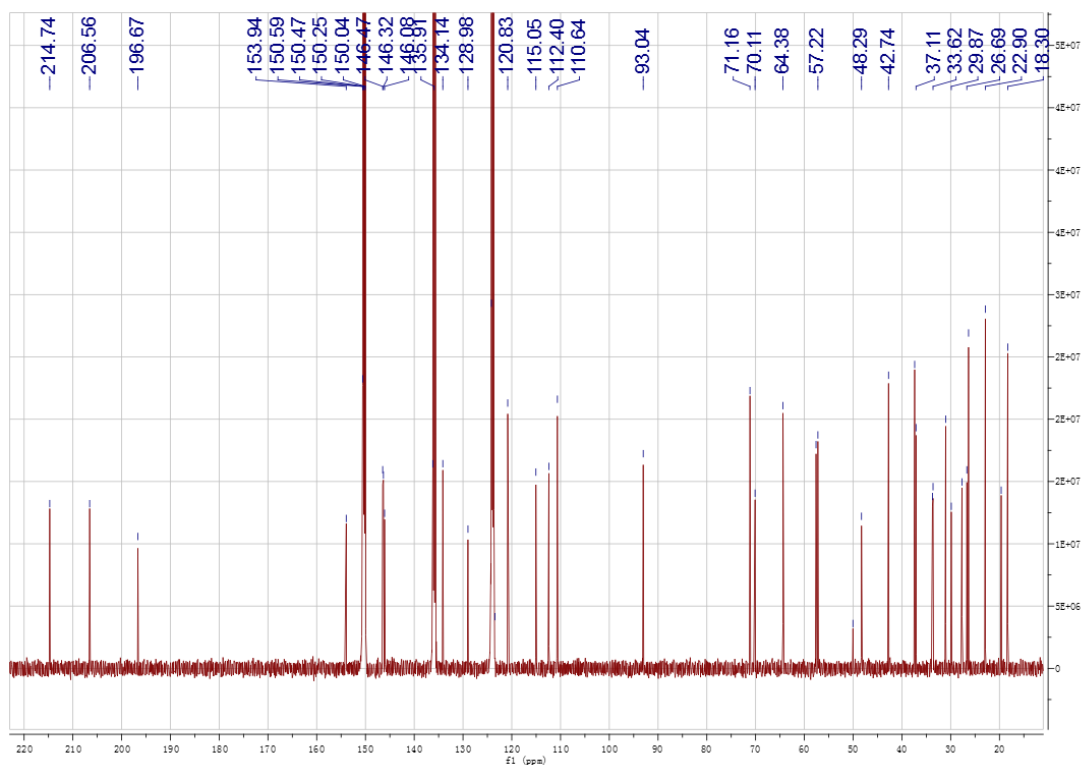

<sup>13</sup>C-NMR spectrum of compound **4** in CD<sub>5</sub>N<sub>5</sub>

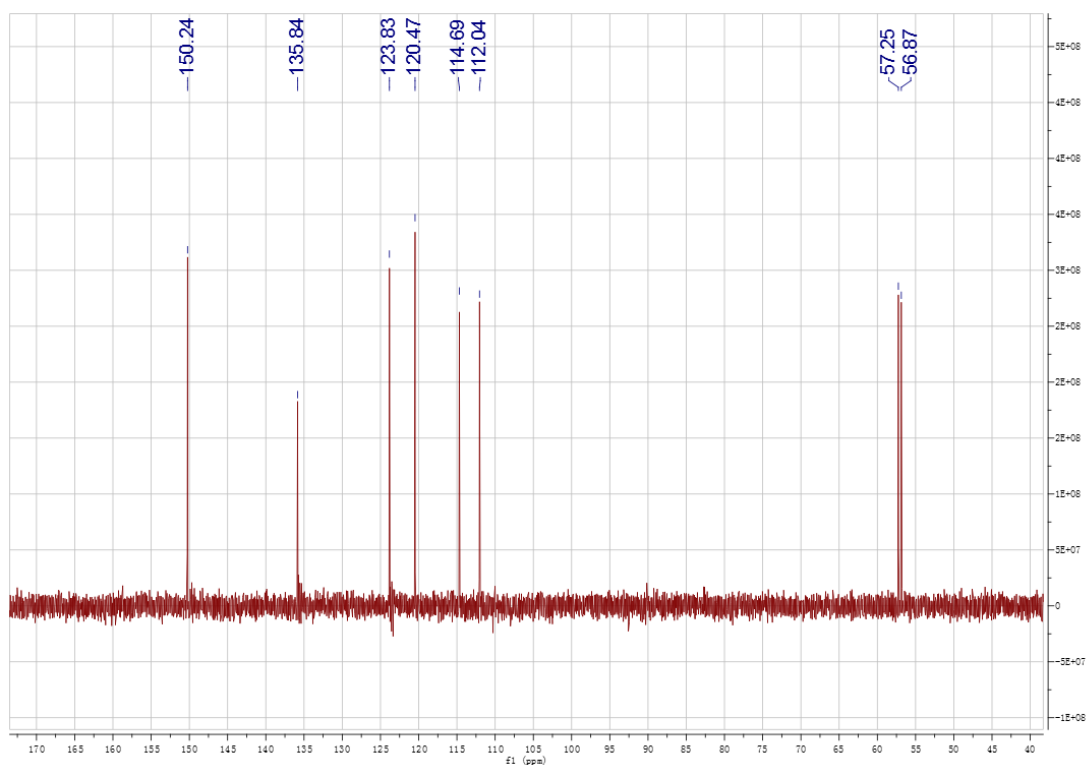

DEPT spectrum of compound **4** in  $\text{CD}_5\text{N}_5$

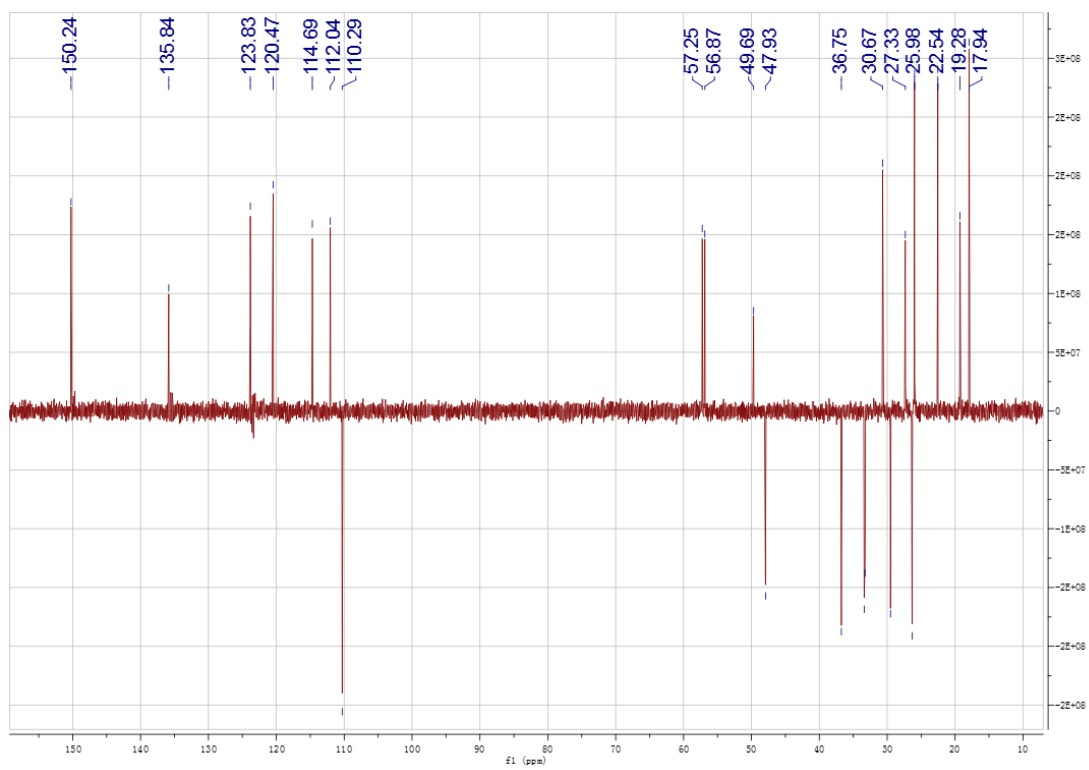

DEPT spectrum of compound **4** in  $\text{CD}_5\text{N}_5$

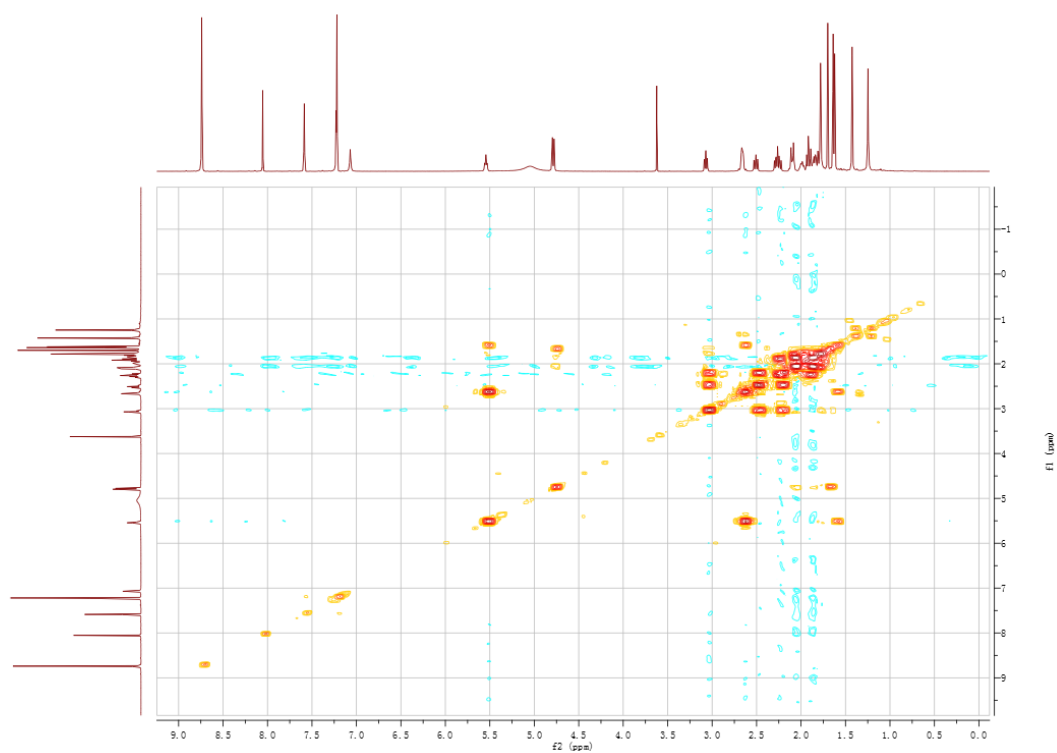

$^1\text{H}$ - $^1\text{H}$  COSY spectrum of compound **4** in  $\text{CD}_5\text{N}_5$

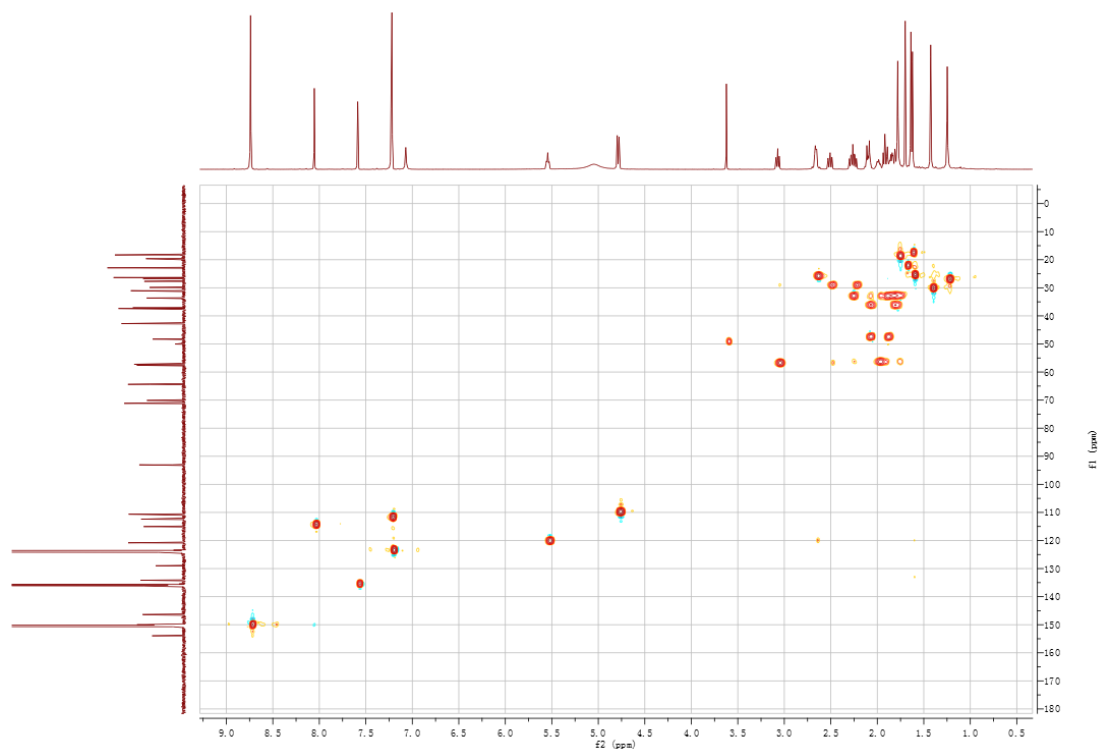

HSQC spectrum of compound **4** in  $\text{CD}_5\text{N}_5$

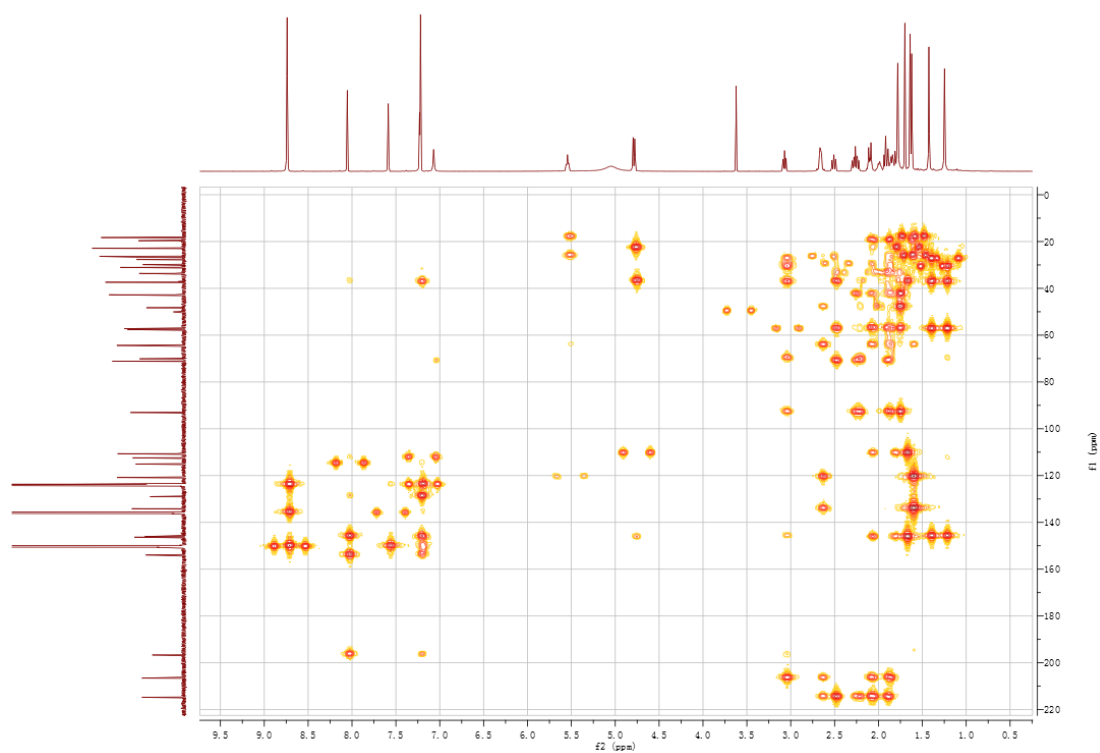

HMBC spectrum of compound **4** in  $\text{CD}_5\text{N}_5$

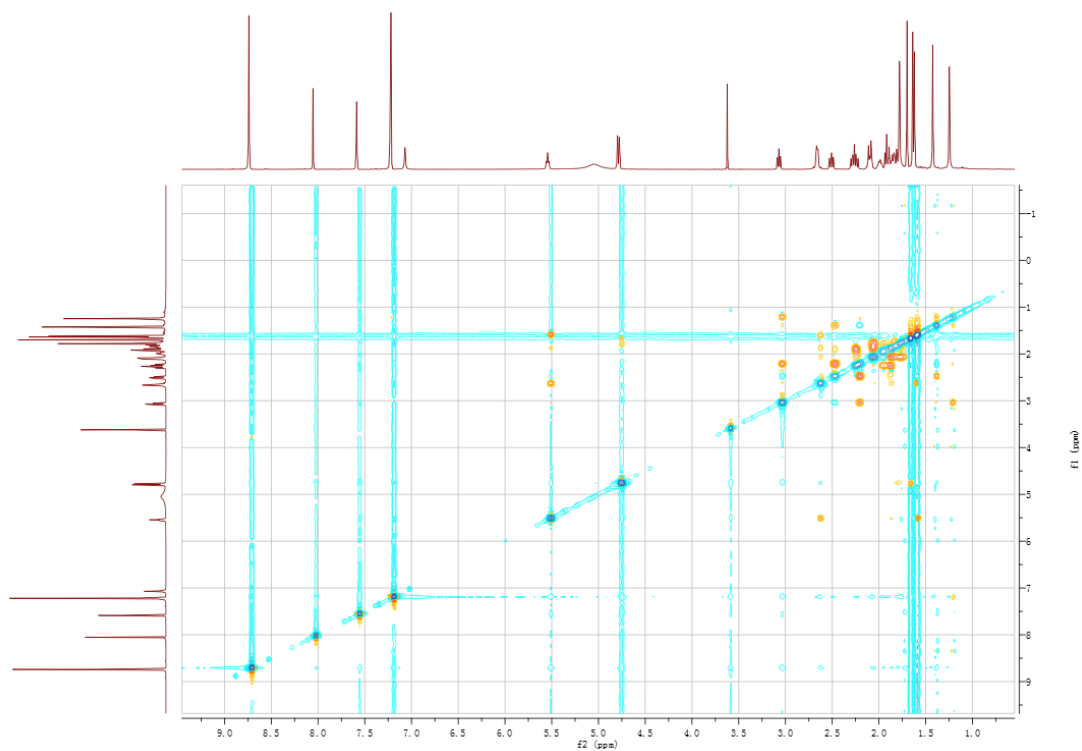

ROESY spectrum of compound **4** in  $\text{CD}_5\text{N}_5$

|                               |                      |                      |                     |
|-------------------------------|----------------------|----------------------|---------------------|
| <b>Data Filename</b>          | 160307ESIA2.d        | <b>Sample Name</b>   | GF-63               |
| <b>Sample Type</b>            | Sample               | <b>Position</b>      |                     |
| <b>Instrument Name</b>        | Agilent G6230 TOF MS | <b>User Name</b>     | KIB                 |
| <b>Acq Method</b>             | ESI.m                | <b>Acquired Time</b> | 3/8/2016 9:21:10 AM |
| <b>IRM Calibration Status</b> | Success              | <b>DA Method</b>     | Default.m           |
| <b>Comment</b>                |                      |                      |                     |

  

|                       |                             |
|-----------------------|-----------------------------|
| <b>Sample Group</b>   | <b>Info.</b>                |
| <b>Acquisition SW</b> | 6200 series TOF/6500 series |
| <b>Version</b>        | Q-TOF B.05.01 (B5125.2)     |

### User Spectra

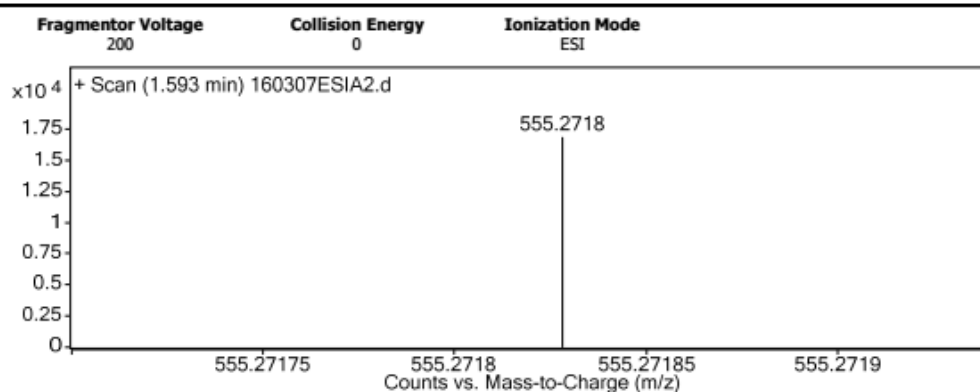

HR-ESI-MS spectrum of compound **4**

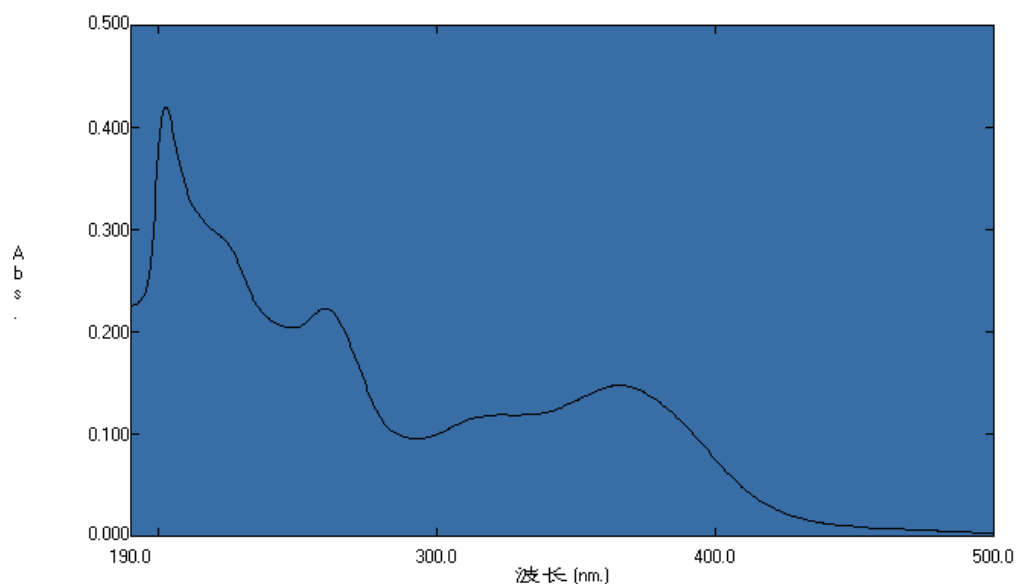

UV spectrum of compound **4**

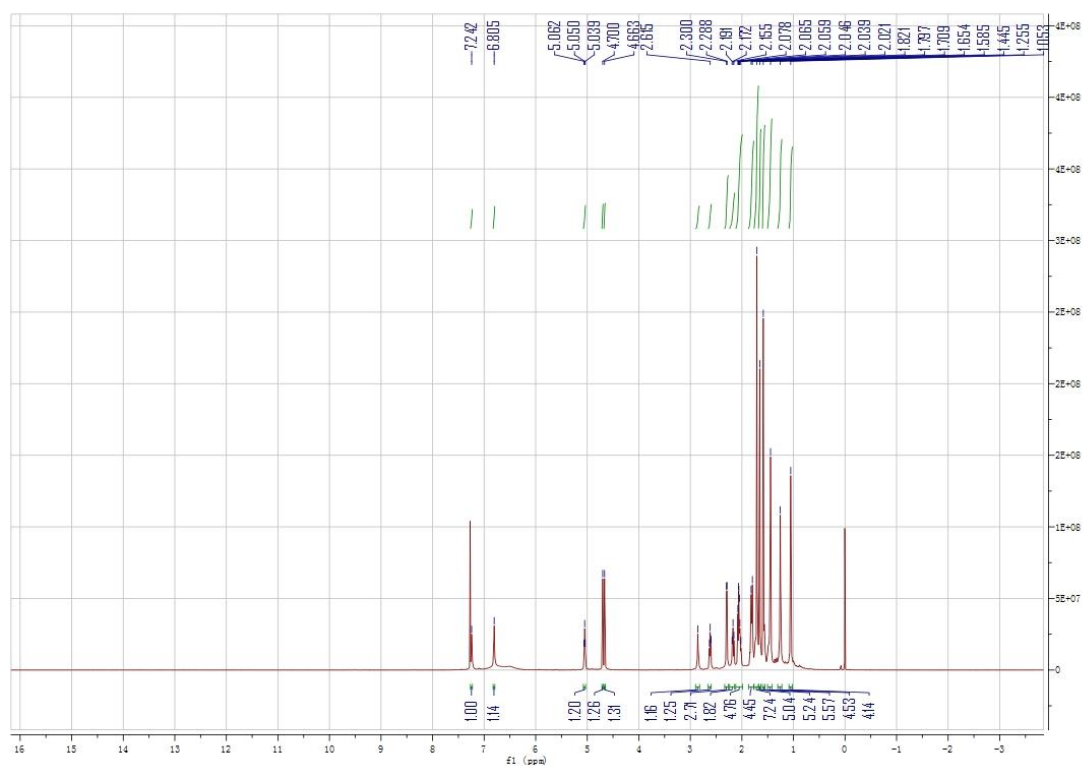

<sup>1</sup>H-NMR spectrum of compound **4** in CDCl<sub>3</sub>

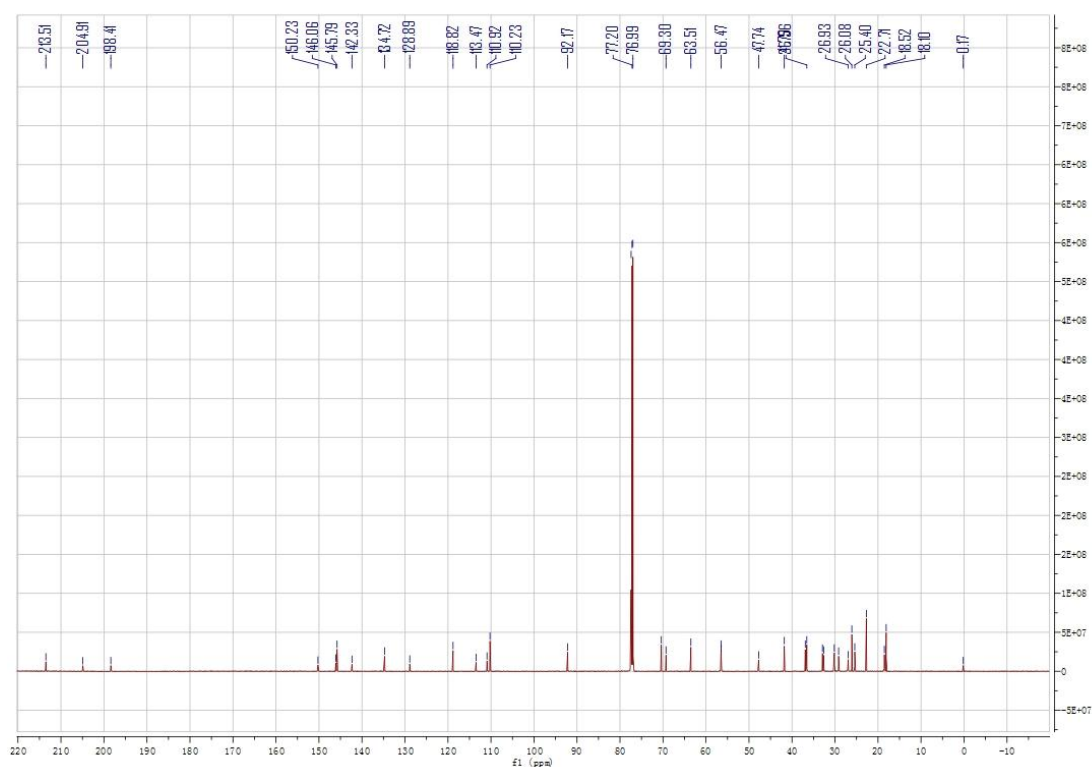

<sup>13</sup>C-NMR spectrum of compound **4** in CDCl<sub>3</sub>



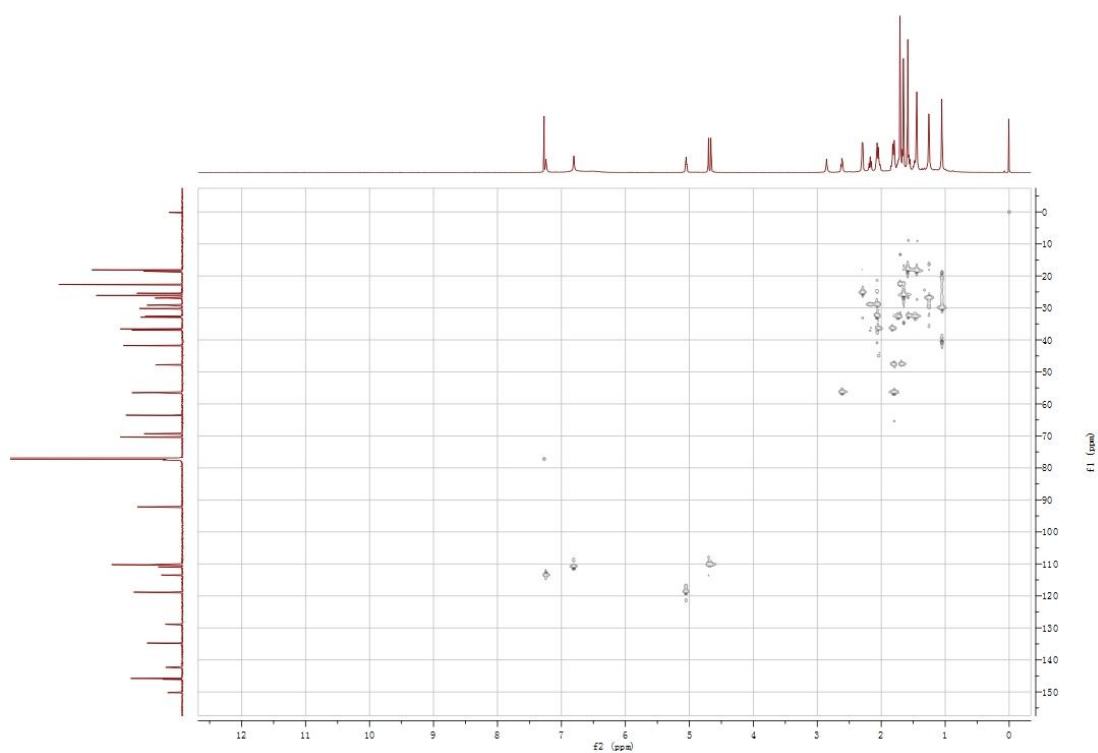

HSQC of compound **4** in CDCl<sub>3</sub>

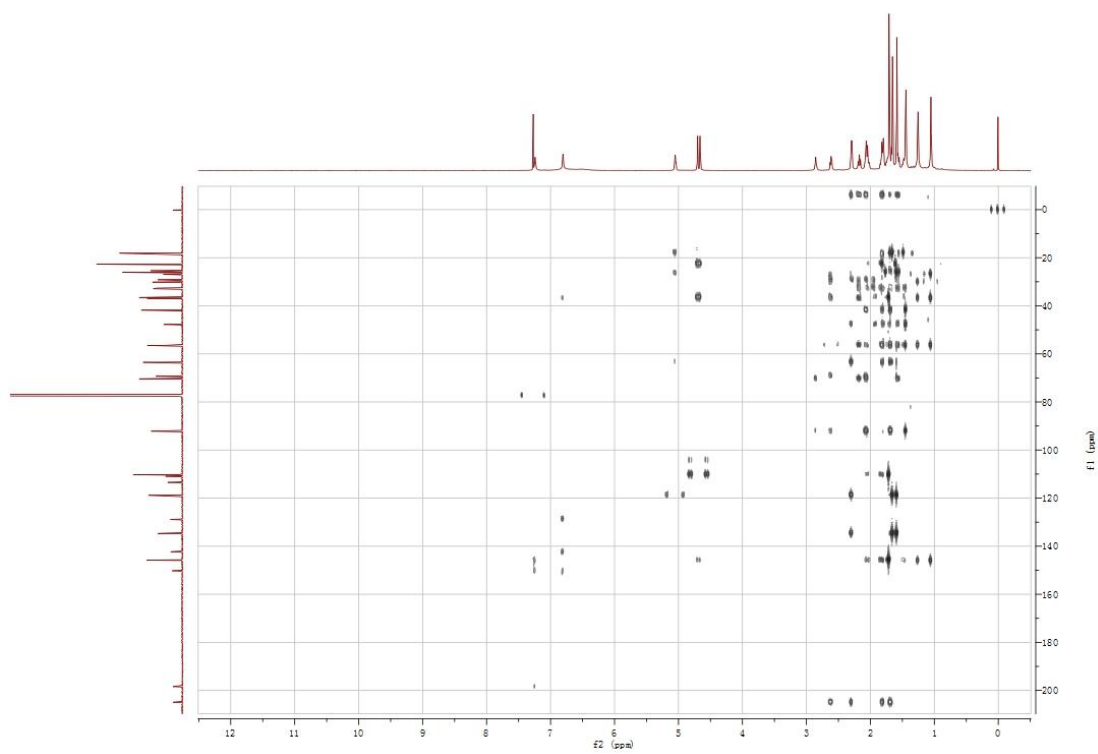

HMBC of compound **4** in CDCl<sub>3</sub>

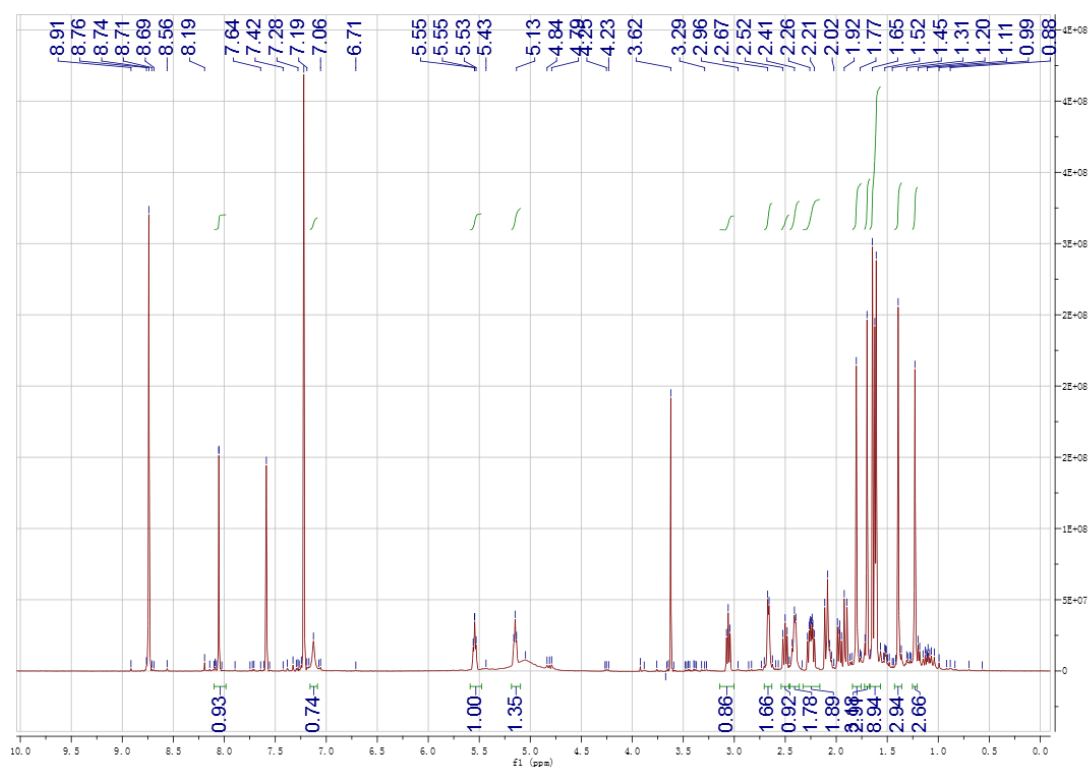

<sup>1</sup>H-NMR spectrum of compound **5** in CD<sub>5</sub>N<sub>5</sub>

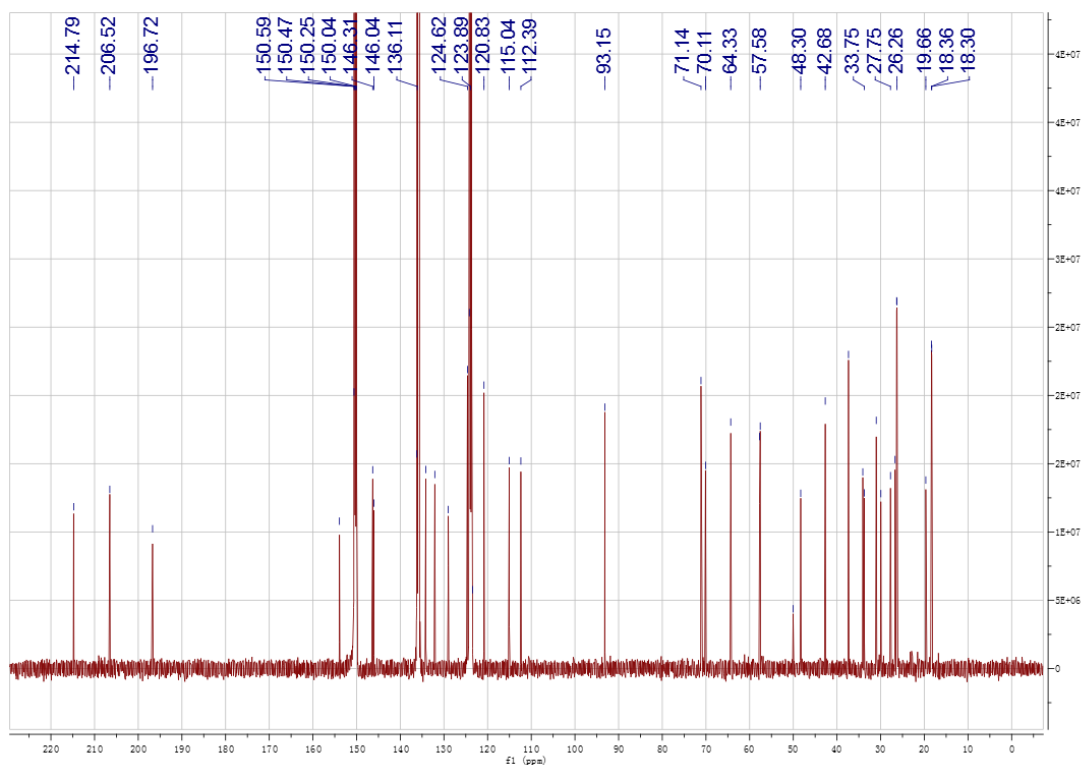

<sup>13</sup>C-NMR spectrum of compound **5** in CD<sub>5</sub>N<sub>5</sub>

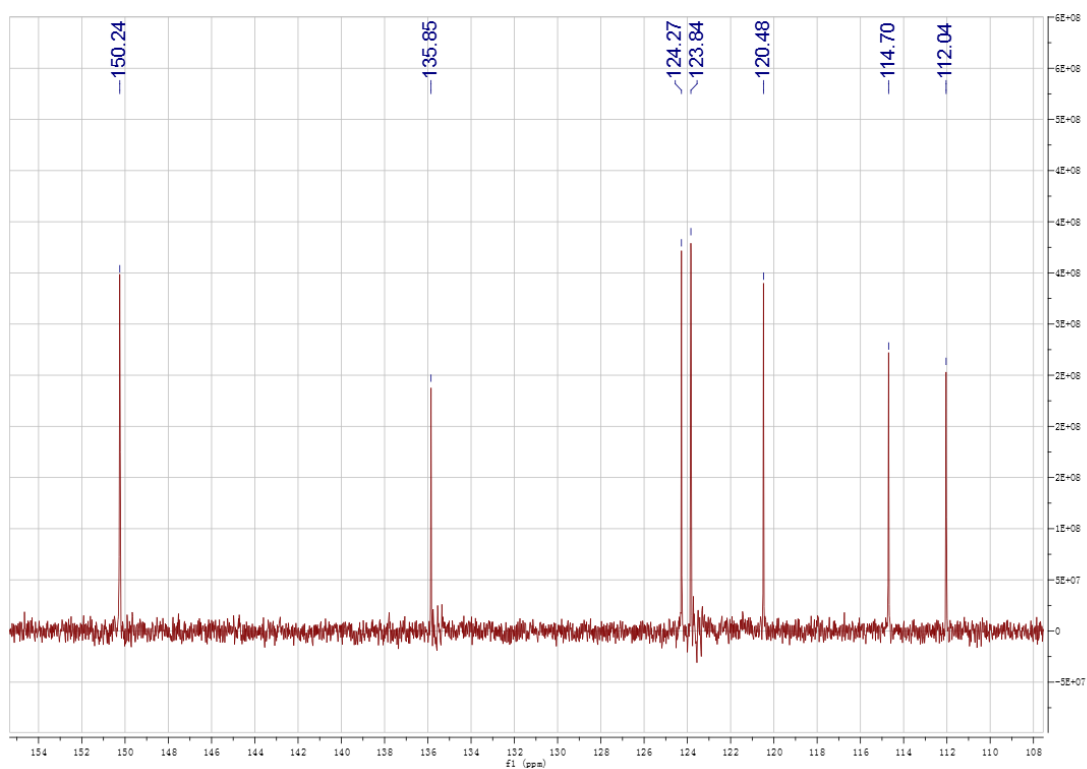

DEPT spectrum of compound **5** in CD<sub>5</sub>N<sub>5</sub>

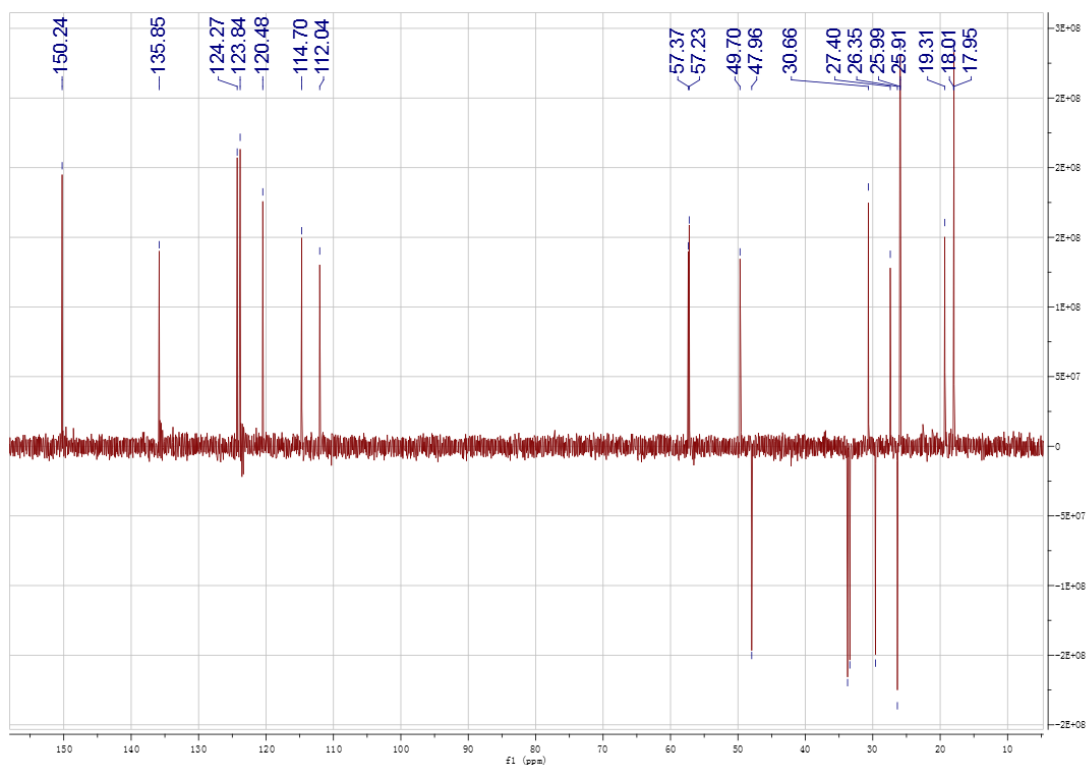

DEPT spectrum of compound **5** in CD<sub>5</sub>N<sub>5</sub>

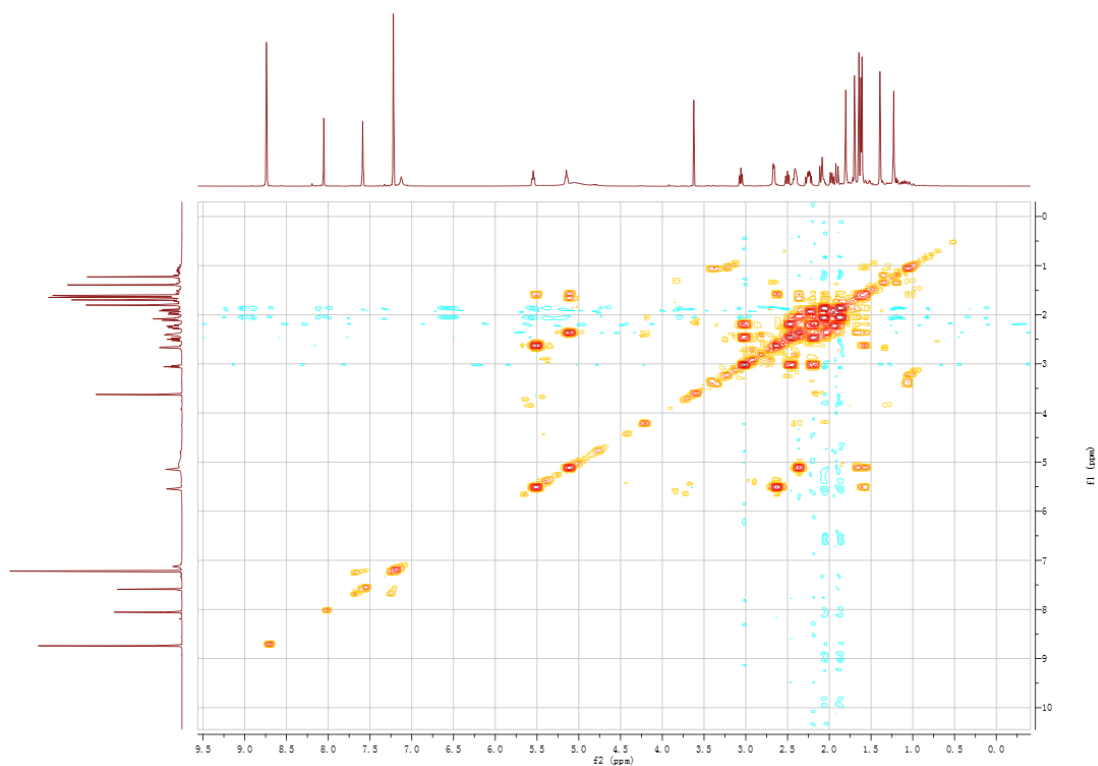

$^1\text{H}$ - $^1\text{H}$  COSY spectrum of compound **5** in  $\text{CD}_5\text{N}_5$

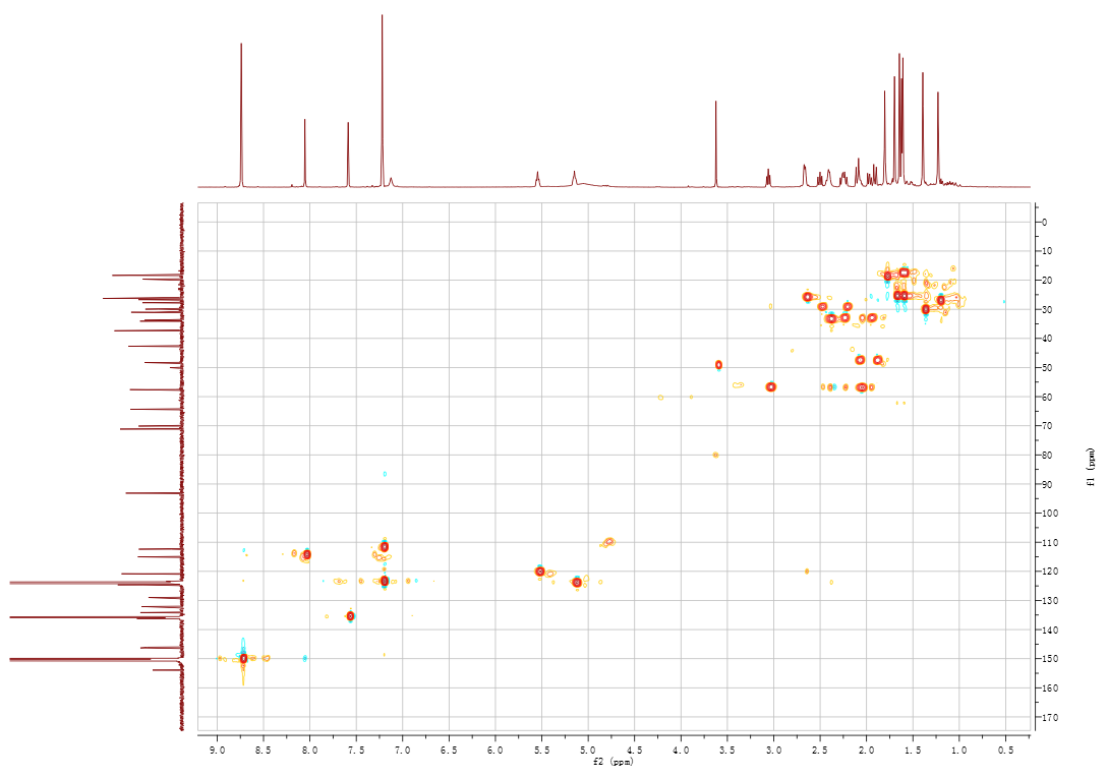

HSQC spectrum of compound **5** in  $\text{CD}_5\text{N}_5$

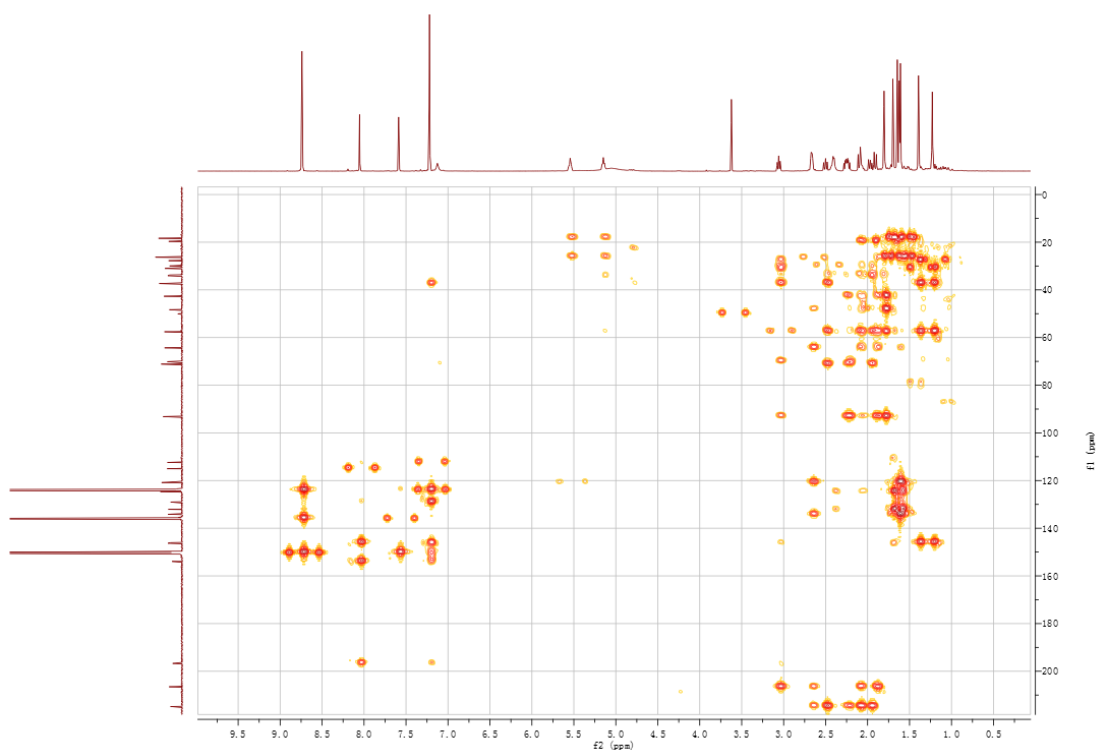

HMBC spectrum of compound **5** in  $\text{CD}_5\text{N}_5$

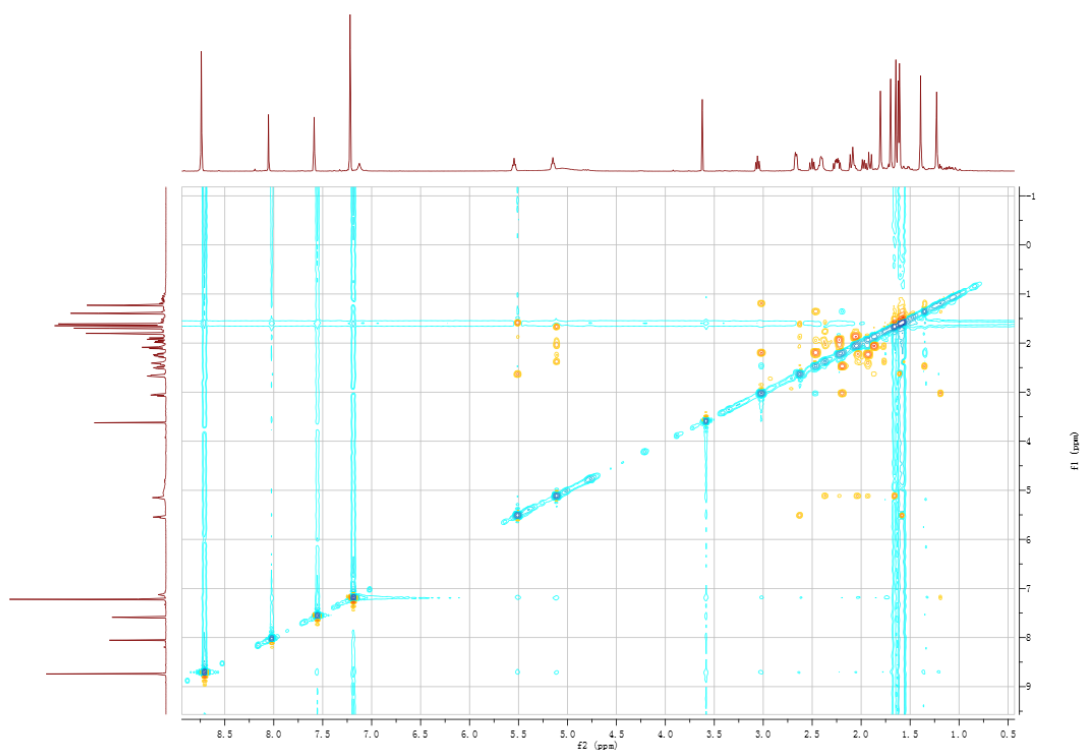

ROESY spectrum of compound **5** in  $\text{CD}_5\text{N}_5$

|                               |                      |                      |                     |
|-------------------------------|----------------------|----------------------|---------------------|
| <b>Data Filename</b>          | 160307ESIA3.d        | <b>Sample Name</b>   | GF-66               |
| <b>Sample Type</b>            | Sample               | <b>Position</b>      |                     |
| <b>Instrument Name</b>        | Agilent G6230 TOF MS | <b>User Name</b>     | KIB                 |
| <b>Acq Method</b>             | ESI.m                | <b>Acquired Time</b> | 3/8/2016 9:23:35 AM |
| <b>IRM Calibration Status</b> | Success              | <b>DA Method</b>     | Default.m           |
| <b>Comment</b>                |                      |                      |                     |

|                       |                             |              |
|-----------------------|-----------------------------|--------------|
| <b>Sample Group</b>   |                             | <b>Info.</b> |
| <b>Acquisition SW</b> | 6200 series TOF/6500 series |              |
| <b>Version</b>        | Q-TOF B.05.01 (B5125.2)     |              |

### User Spectra

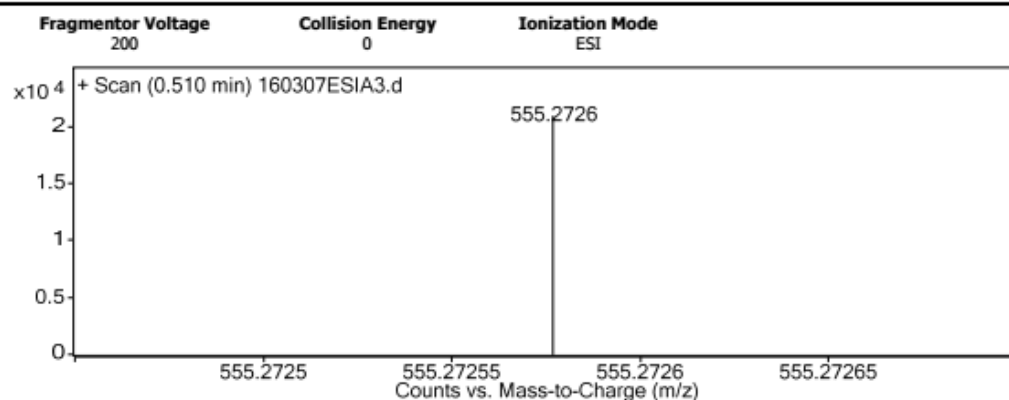

HR-ESI-MS spectrum of compound **5**

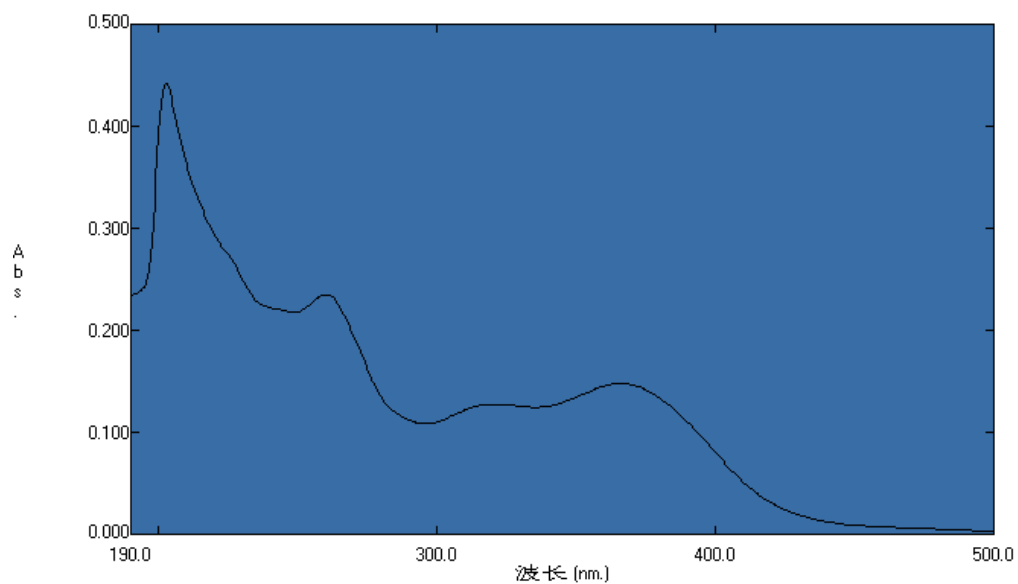

UV spectrum of compound **5**

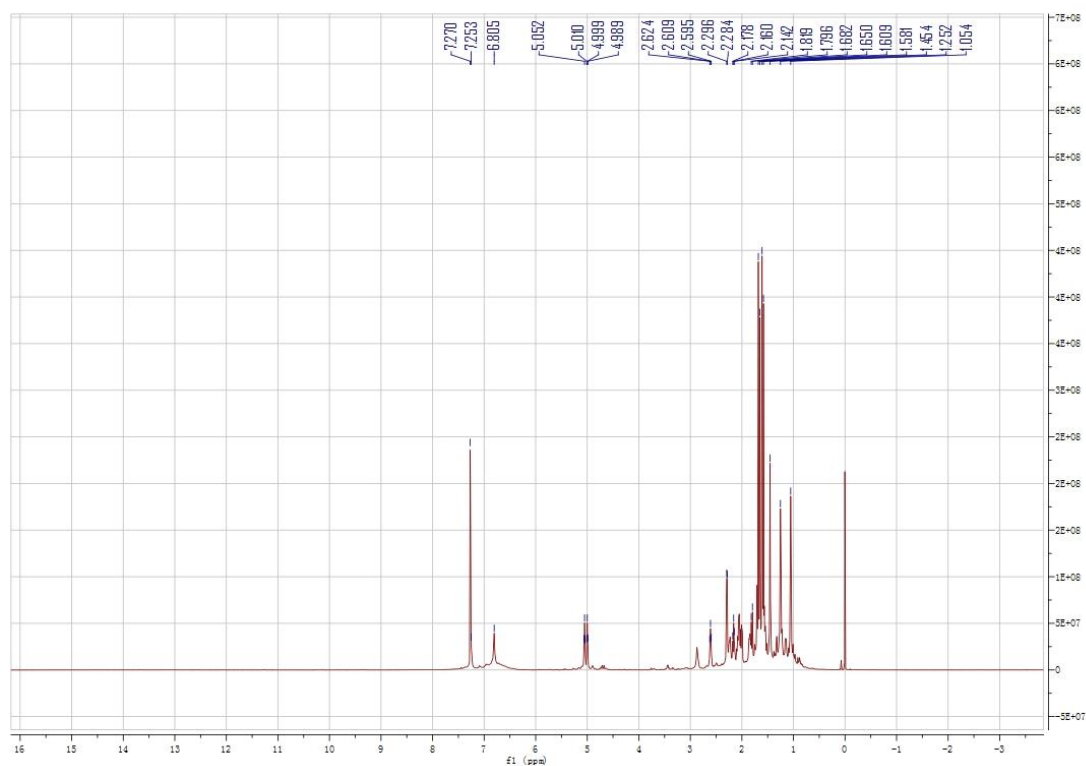

$^1\text{H}$ -NMR spectrum of compound **5** in  $\text{CDCl}_3$

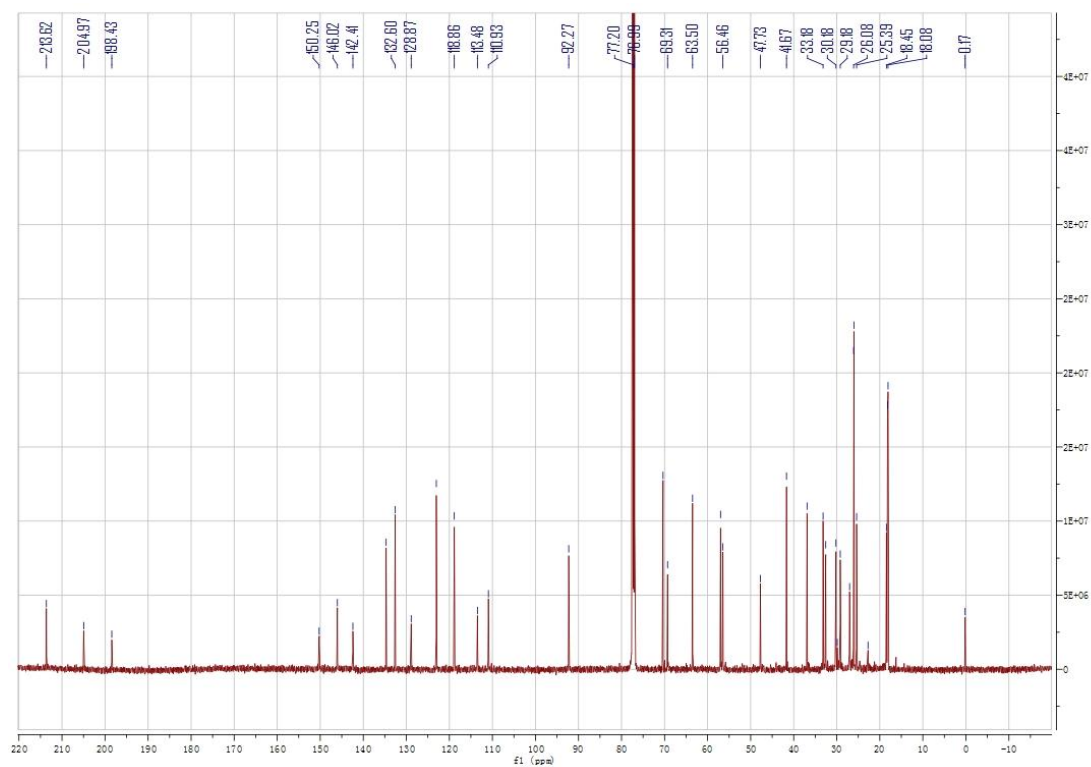

$^{13}\text{C}$ -NMR spectrum of compound **5** in  $\text{CDCl}_3$

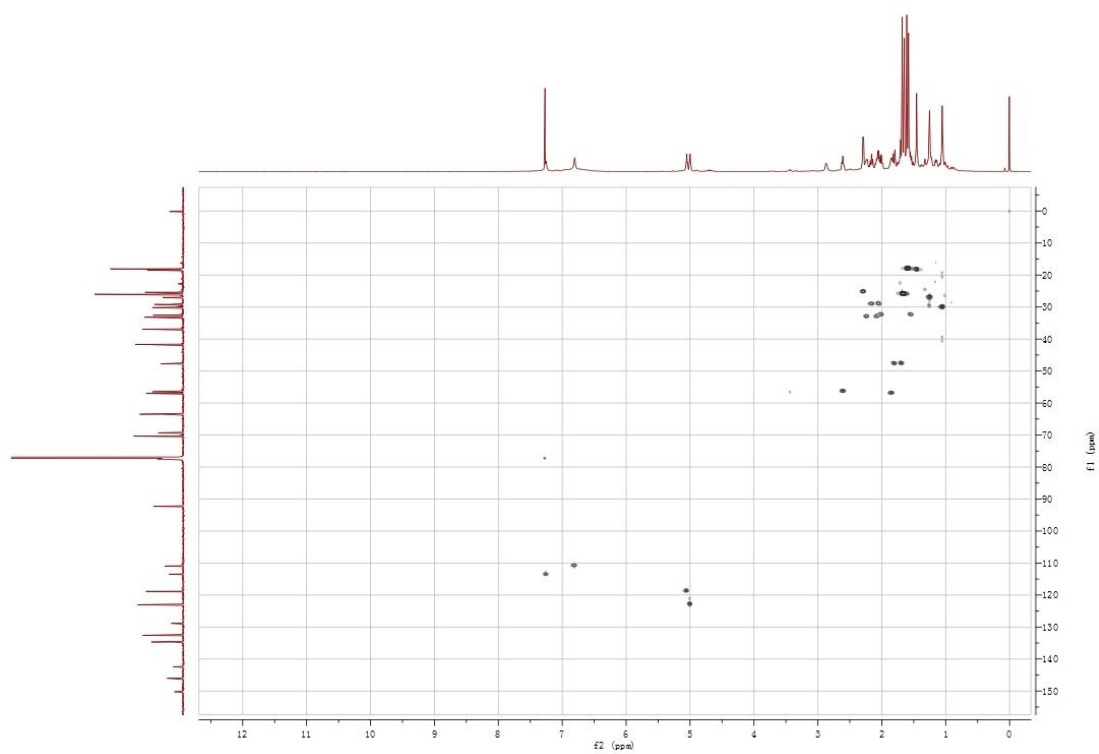

HSQC spectrum of compound **5** in  $\text{CDCl}_3$

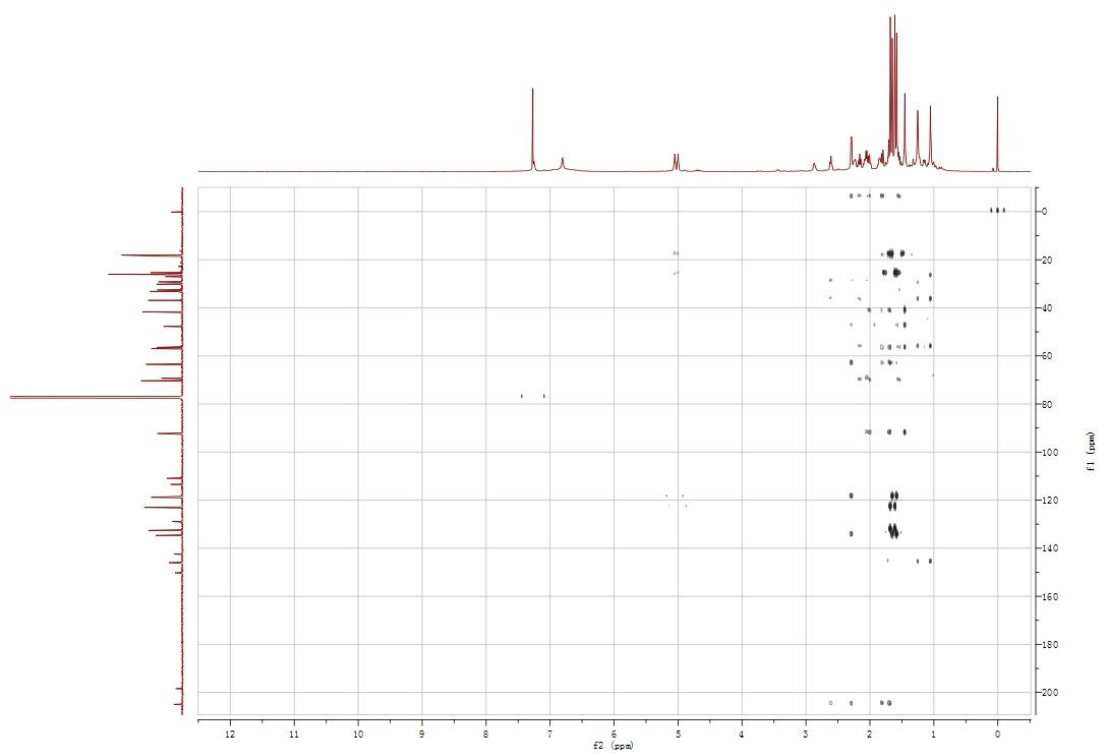

HMBC spectrum of compound **5** in  $\text{CDCl}_3$



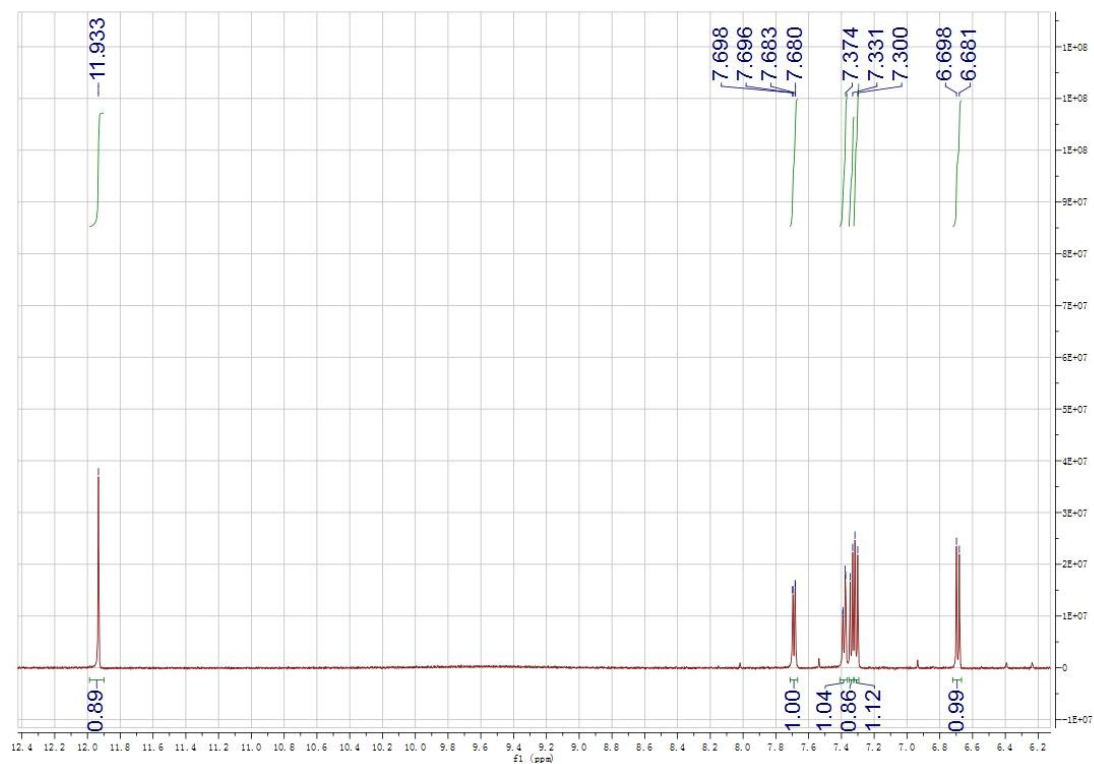

<sup>1</sup>H-NMR of compound 6

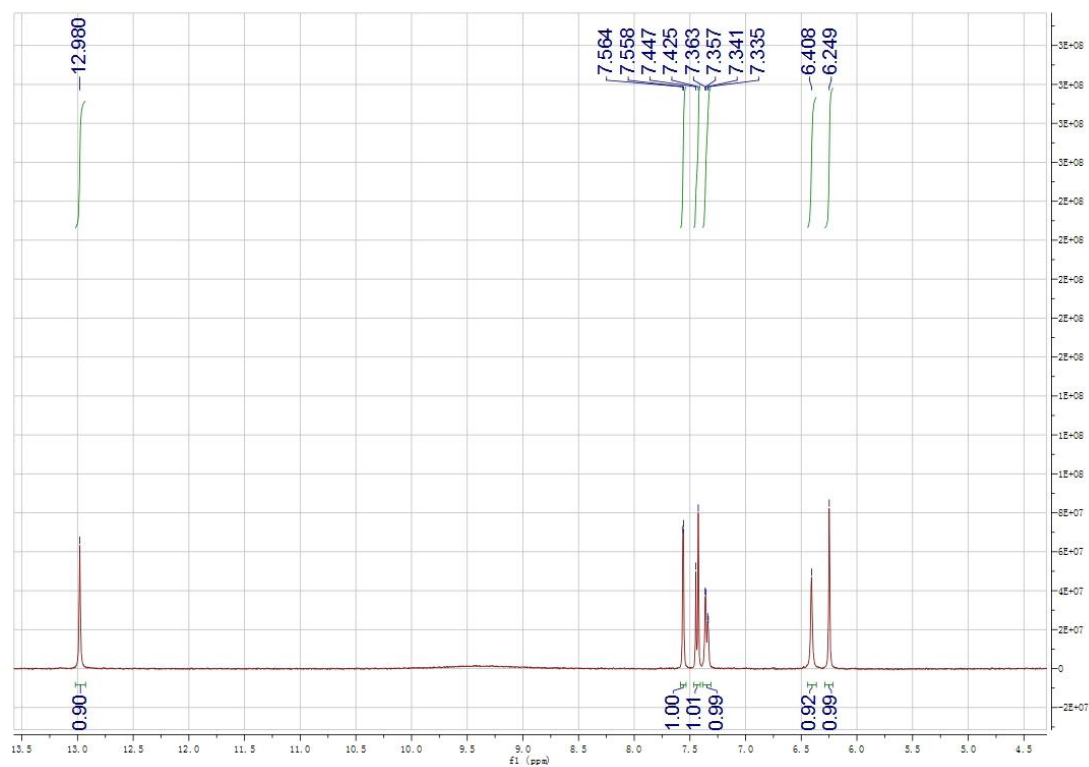

<sup>1</sup>H-NMR of compound 7

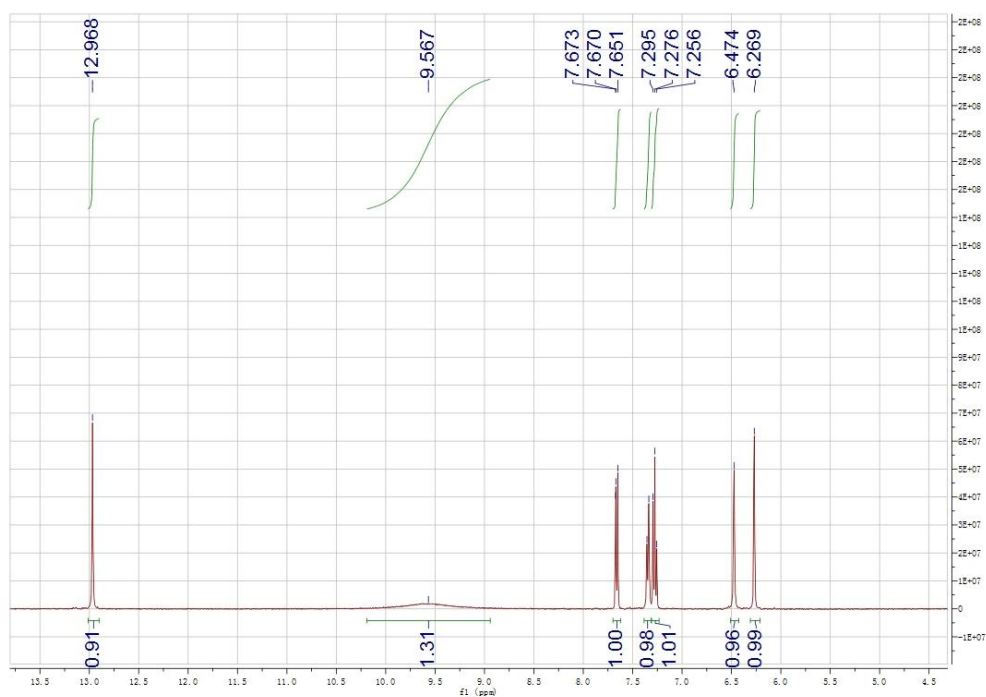

<sup>1</sup>H-NMR of compound 8

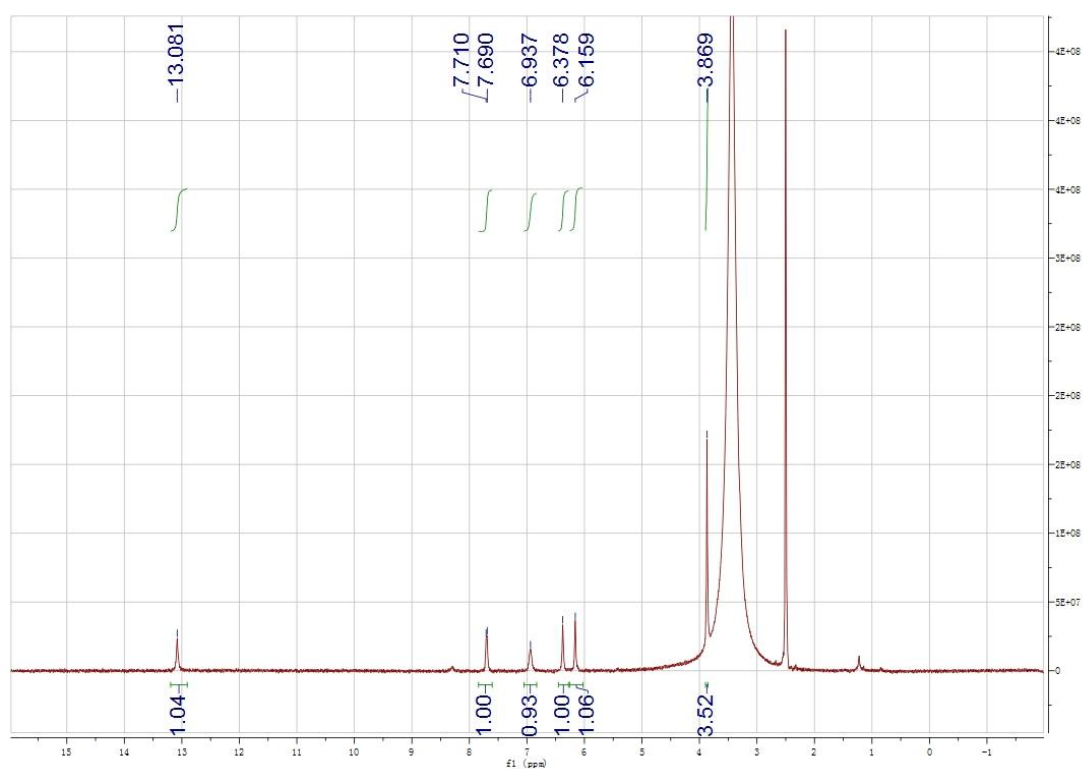

<sup>1</sup>H-NMR of compound 9

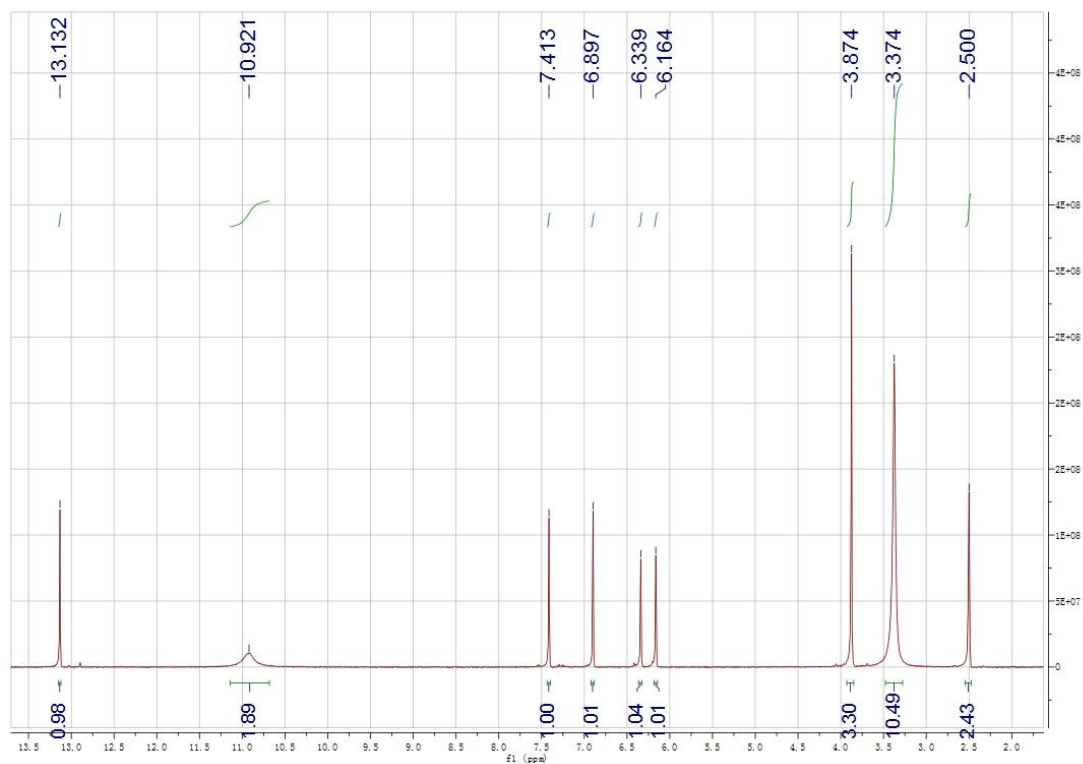

<sup>1</sup>H-NMR of compound 10

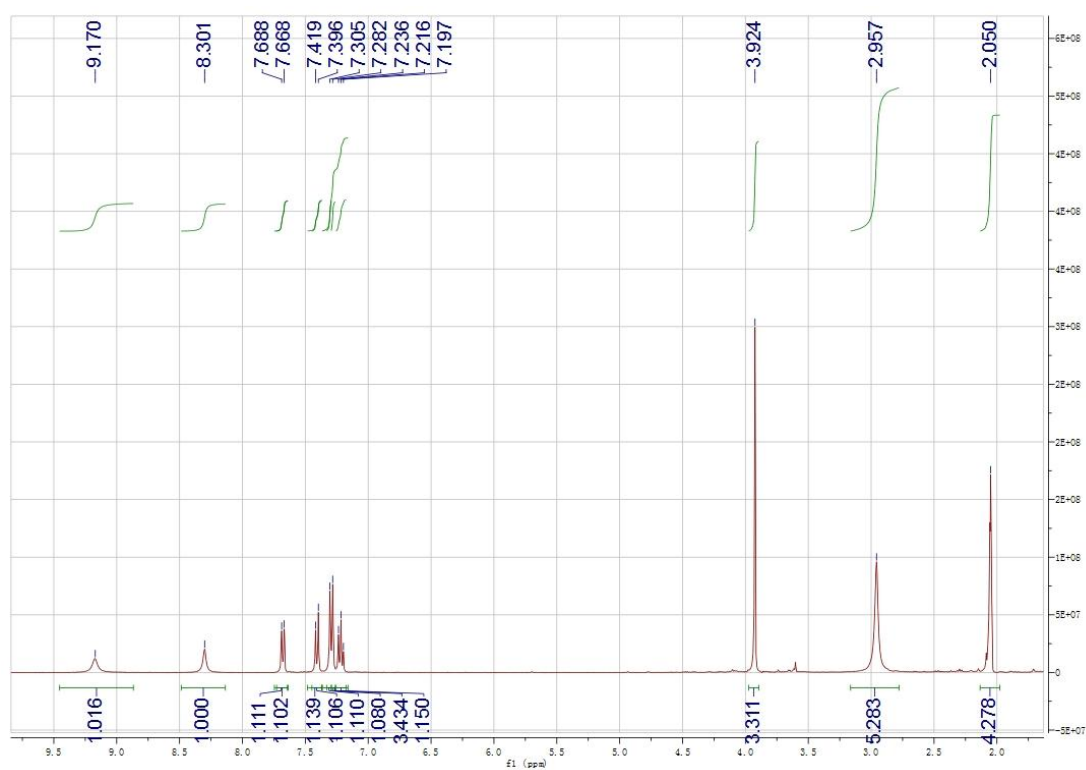

<sup>1</sup>H-NMR of compound 11

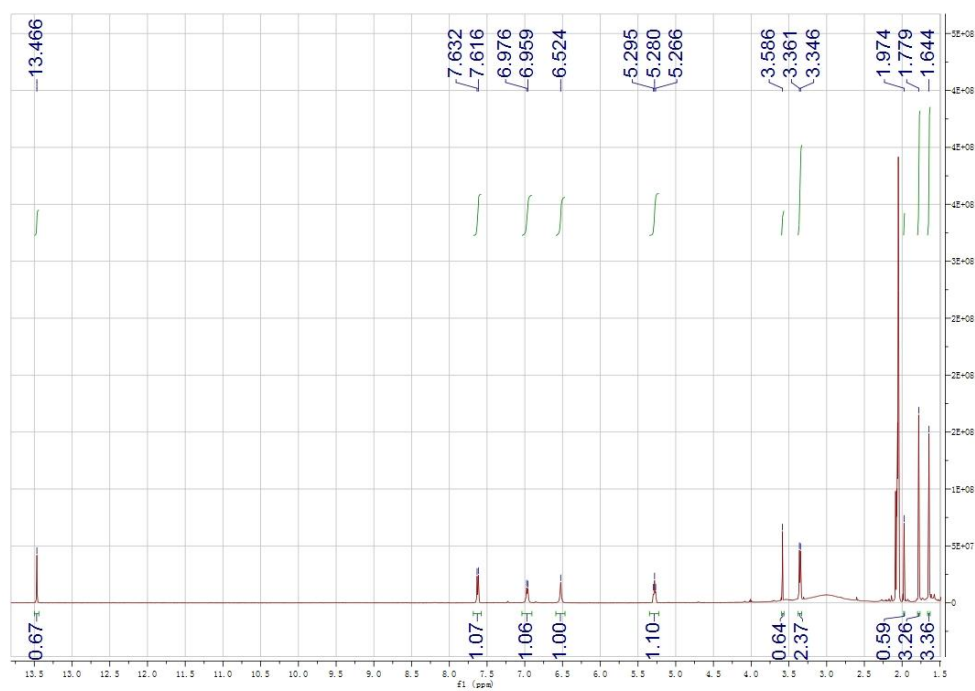

<sup>1</sup>H-NMR of compound 12

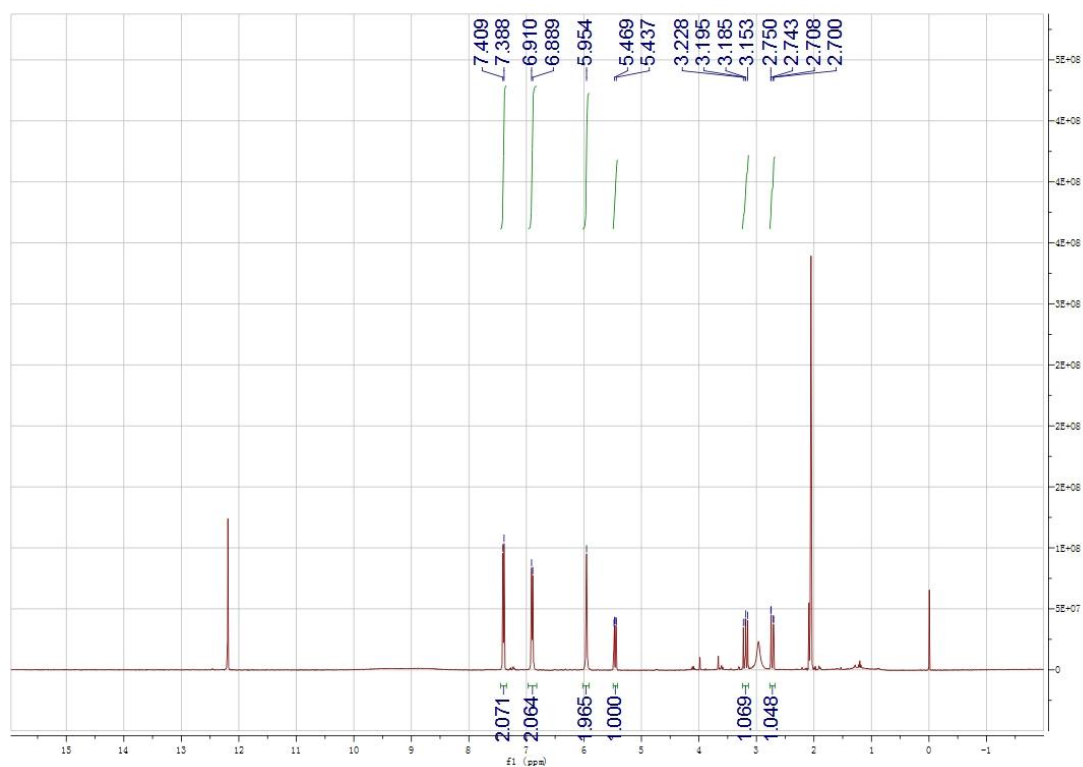

<sup>1</sup>H-NMR of compound 13

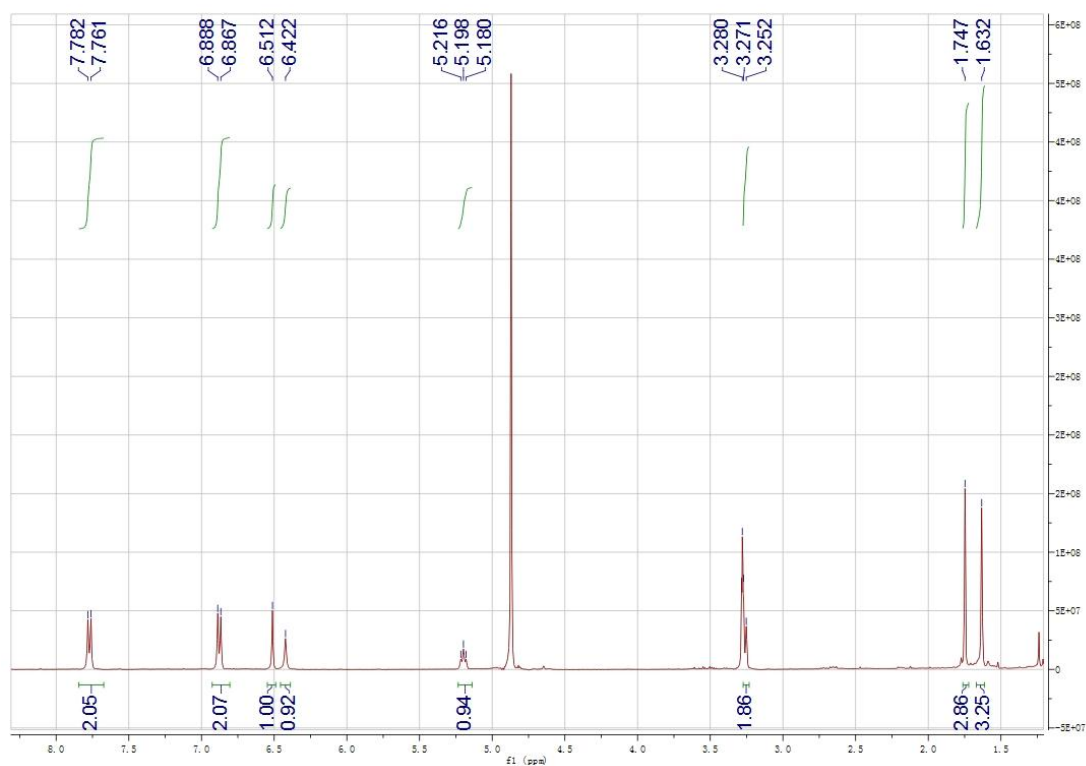

$^1\text{H}$ -NMR of compound 14

Table 1: Full HMBCs of compounds **1-3**

| No | <b>1</b>             | <b>2</b>             | <b>3</b>             |
|----|----------------------|----------------------|----------------------|
| 1  |                      |                      |                      |
| 2  |                      |                      |                      |
| 3  |                      |                      |                      |
| 4  |                      |                      |                      |
| 5  |                      |                      |                      |
| 6  | C-7, 34, 5, 4, 8     | C-7, 5, 4            | C-17, 7, 8, 9, 34, 4 |
| 7  |                      |                      |                      |
| 8  |                      |                      |                      |
| 9  |                      |                      |                      |
| 10 |                      |                      |                      |
| 11 |                      |                      |                      |
| 12 | C-16, 13, 14, 10     | C-16, 13, 14, 10     | C-16, 13, 14, 10     |
| 13 |                      |                      |                      |
| 14 |                      |                      |                      |
| 15 | C-11, 13             |                      | C-11, 13, 14         |
| 16 | C-12, 14, 10         | C-10, 14, 12         | C-12, 14, 10         |
| 17 |                      | C-5, 18, 19, 4       | C-18, 5, 19, 4, 22   |
| 18 | C-20, 17, 19, 21     | C-21, 17, 22, 20, 19 |                      |
| 19 |                      |                      |                      |
| 20 | C-21, 18, 19         | C-18, 21, 19         | C-21, 19, 18         |
| 21 | C-19, 20             |                      | C-20, 19, 18         |
| 22 |                      |                      |                      |
| 23 |                      | C-26, 22, 25, 24     |                      |
| 24 |                      |                      |                      |
| 25 | C-23, 24             | C-23, 24, 26         | C-26, 23, 24         |
| 26 | C-23, 24             |                      | C-24, 25, 23         |
| 27 | C-1, 28, 29, 9       | C-1, 28, 29, 9       | C-1, 28, 29          |
| 28 | C-30, 31             |                      |                      |
| 29 |                      |                      |                      |
| 30 | C-28, 29             |                      | C-28, 29             |
| 31 | C-28, 29             |                      | C-28, 29             |
| 32 | C-1, 8, 7, 33        | C-33, 8, 1, 7        | C-33, 7, 8, 1        |
| 33 | C-1, 8, 7, 32        | C-32, 8, 1, 7        | C-32, 7, 8, 1        |
| 34 | C-36, 35, 4, 3, 6, 7 | C-6, 7, 3, 35, 2, 4  | C-6, 3, 4            |
| 35 | C-37, 38, 34, 3      | C-37, 38, 34, 3      | C-7, 34              |
| 36 |                      |                      |                      |
| 37 | C-35, 36             |                      | C-38, 36, 35         |
| 38 | C-35, 36             |                      | C-37, 36, 35         |

Table 2  $^1\text{H}$ ,  $^{13}\text{C}$  NMR data of compounds **4** and **5** (in  $\text{CDCl}_3$ )

| No | 4                    |                                   | 5                    |                                   |
|----|----------------------|-----------------------------------|----------------------|-----------------------------------|
|    | $^{13}\text{C}$ -NMR | $^1\text{H}$ -NMR                 | $^{13}\text{C}$ -NMR | $^1\text{H}$ -NMR                 |
| 1  | 63.5                 |                                   | 63.5                 |                                   |
| 2  | 213.5                |                                   | 213.6                |                                   |
| 3  | 70.4                 |                                   | 70.4                 |                                   |
| 4  | 32.7                 | 2.06, 1.57 m, 2H                  | 32.6                 | 2.01, 1.55 m, 2H                  |
| 5  | 56.4                 | 1.80 m                            | 57.0                 | 1.86 m                            |
| 6  | 41.8                 |                                   | 41.7                 |                                   |
| 7  | 92.2                 |                                   | 92.3                 |                                   |
| 8  | 69.3                 |                                   | 69.3                 |                                   |
| 9  | 204.9                |                                   | 205.0                |                                   |
| 10 | 47.7                 | 1.80, 1.68 m 2H                   | 47.7                 | 1.80 d (13.8), 1.71 m 2H          |
| 11 | 25.4                 | 2.29 d (7.2)                      | 25.4                 | 2.29 d (6.9)                      |
| 12 | 118.8                | 5.05 t (7.2)                      | 118.9                | 5.06 t (6.9)                      |
| 13 | 134.7                |                                   | 134.7                |                                   |
| 14 | 26.1                 | 1.65 s 3H                         | 26.1                 | 1.65 s 3H                         |
| 15 | 18.1                 | 1.58 s 3H                         | 18.1                 | 1.58 s 3H                         |
| 16 | 29.2                 | 2.18 dd (11.4, 9.6),<br>2.06 m 2H | 29.2                 | 2.18 dd (10.8, 9.4),<br>2.05 m 2H |
| 17 | 56.5                 | 2.61 dd (9.6, 8.4)                | 56.5                 | 2.61 dd (9.4, 8.4)                |
| 18 | 36.9                 |                                   | 36.9                 |                                   |
| 19 | 26.9                 | 1.25 s 3H                         | 27.0                 | 1.25 s 3H                         |
| 20 | 30.2                 | 1.05 s 3H                         | 33.2                 | 1.05 s 3H                         |
| 21 | 32.9                 | 1.73, 1.47 m, 2H                  | 32.9                 | 2.24, 2.08 m, 2H                  |
| 22 | 36.6                 | 2.04, 1.82 m, 2H                  | 123.0                | 5.00 t (6.6)                      |
| 23 | 146.1                |                                   | 132.6                |                                   |
| 24 | 110.2                | 4.70 s, 4.66 s                    | 18.2                 | 1.61 s 3H                         |
| 25 | 22.7                 | 1.70 s 3H                         | 26.0                 | 1.68 s 3H                         |
| 26 | 18.5                 | 1.44 s 3H                         | 18.5                 | 1.45 s 3H                         |
| 27 | 198.4                |                                   | 198.4                |                                   |
| 28 | 128.9                |                                   | 128.9                |                                   |
| 29 | 145.8                |                                   | 146.0                |                                   |
| 30 | 110.9                | 6.81 s                            | 110.9                | 6.81 s                            |
| 31 | 142.3                |                                   | 142.4                |                                   |
| 32 | 150.2                |                                   | 150.3                |                                   |
| 33 | 113.5                | 7.24 s                            | 113.5                | 7.26 s                            |

HPLC condition: UV  $\lambda_{\text{max}}$  254 nm, column: YMC-Pack ODS-A column (250 × 10 mm, 5  $\mu\text{m}$ ); flow rate: 3 mL/min

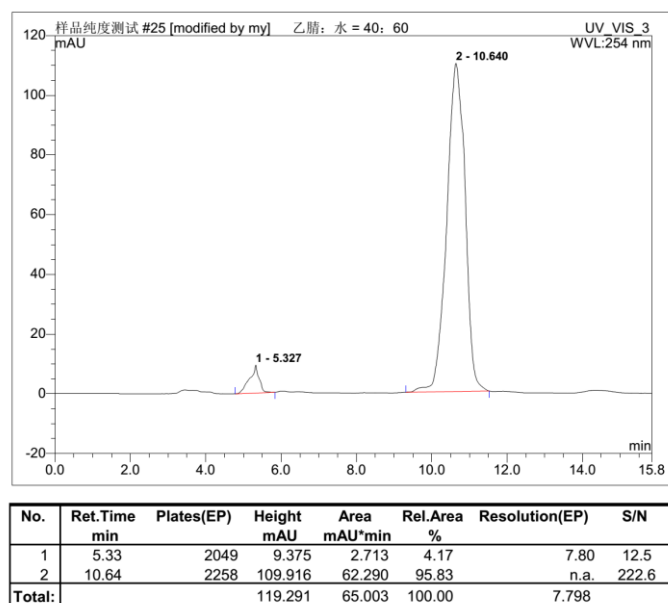

HPLC Chromatographic profiles of compound 15  
(CH<sub>3</sub>CN : H<sub>2</sub>O = 40 : 60)

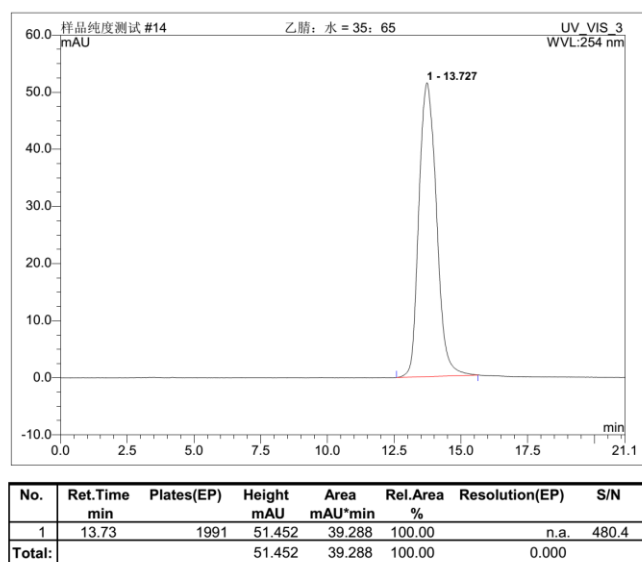

HPLC Chromatographic profiles of compound 16  
(CH<sub>3</sub>CN : H<sub>2</sub>O = 35 : 65)



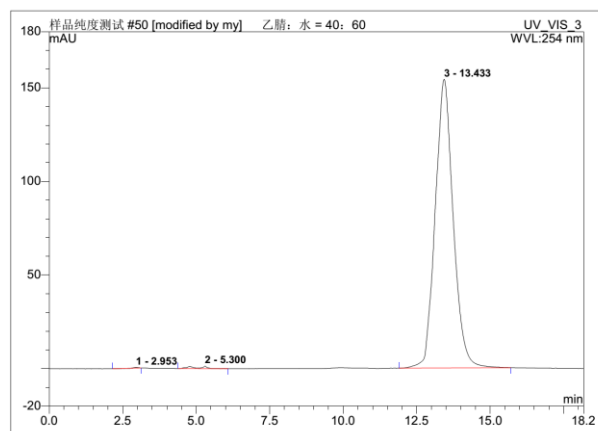

| No.    | Ret.Time<br>min | Plates(EP) | Height<br>mAU | Area<br>mAU*min | Rel.Area<br>% | Resolution(EP) | S/N   |
|--------|-----------------|------------|---------------|-----------------|---------------|----------------|-------|
| 1      | 2.95            | 1336       | 0.411         | 0.028           | 0.03          | 3.26           | 4.6   |
| 2      | 5.30            | 358        | 1.309         | 0.595           | 0.54          | 7.35           | 5.9   |
| 3      | 13.43           | 2391       | 154.186       | 109.509         | 99.43         | n.a            | 693.8 |
| Total: |                 |            | 155.906       | 110.131         | 100.00        | 10.607         |       |

HPLC Chromatographic profiles of compound 17  
(CH<sub>3</sub>CN : H<sub>2</sub>O = 40 : 60)
